# Supplementary material for: Multi-omics profiling identifies M1 macrophage polarization-associated biomarkers in hepatitis B virus-related acute-on-chronic liver failure
Source: Front Microbiol. 2025 Sep 24;16:1630042. doi: 10.3389/fmicb.2025.1630042 (PMC12504312; doi:10.3389/fmicb.2025.1630042)
Supplement: Supplementary file 10 [file Table_6.xlsx]

## Sheet: Supplementary Table 6
	ID	Description	setSize	enrichmentScore	NES	pvalue	p.adjust	qvalue	rank	leading_edge	core_enrichment
hsa03010	hsa03010	Ribosome	112	0.576198188268499	2.91031877137474	1e-10	6.88e-09	4.25263157894737e-09	4291	tags=67%, list=27%, signal=49%	RPLP0/RPL6/RPL22L1/MRPL21/RPS5/MRPL28/MRPL4/MRPL23/RPL35/MRPS12/FAU/MRPL17/MRPS21/RPS6/RPL8/MRPS16/RPL29/RPL26L1/RPS24/RPS15/RPS27L/MRPS2/RPS9/RPL3/MRPL11/RPS3/RPL19/RPL41/RPS18/RPL15/RPL37/RPS17/RPL36/RPL27/MRPL12/RPL24/RPL32/MRPL14/RPL14/RPS23/RPS10/RPL35A/RPL12/RPS21/RPS12/RPS14/RPS27A/MRPL22/RPL22/RPS28/RPL38/UBA52/RPS15A/RPS16/RPL7/RPL11/RPL18/RPS25/RPS4X/RPS7/RPL23A/MRPL27/RPS19/RPL9/MRPL35…
hsa04612	hsa04612	Antigen processing and presentation	58	0.639251069385275	2.86556345361653	1e-10	6.88e-09	4.25263157894737e-09	3239	tags=71%, list=20%, signal=57%	TAP1/HLA-DQB2/HLA-DRA/KIR2DL4/HLA-DPA1/PSME1/HLA-DQB1/CD74/KLRC4/HLA-F/HSPA6/TAPBP/KIR3DL3/HLA-A/KLRC3/CTSL/CD8A/CD4/HLA-G/HLA-B/HLA-DQA1/RFX5/RFXANK/HSPA4/CTSS/HLA-C/HSP90AB1/KLRD1/CTSB/HLA-DOB/HLA-DMB/HLA-DPB1/HLA-DMA/CIITA/HLA-DOA/LGMN/KIR3DL1/HLA-E/TAP2/HSPA2/PSME3
hsa04110	hsa04110	Cell cycle	153	0.519657303285777	2.78138630598984	1e-10	6.88e-09	4.25263157894737e-09	1982	tags=41%, list=12%, signal=36%	MCM2/BUB1B/MCM7/MCM4/TRIP13/CCNB1/MAD2L1/CDC20/NDC80/CCNB2/CCNA2/CDK1/MCM6/CDCA5/TTK/CHEK1/PTTG1/ORC6/MCM5/SFN/ESPL1/CDC45/CDC25B/PCNA/CDC25A/AURKB/BUB1/ORC1/CDC25C/BUB3/CDKN2A/CCNE1/ESCO2/MAD1L1/CCND1/CDC6/YWHAZ/PPP2R1A/ANAPC7/CDC7/TGFB3/CCNE2/DBF4/CDK4/PLK1/E2F3/CDKN1A/MDM2/ANAPC15/RBX1/CHEK2/TP53/MCM3/CDKN2C/ANAPC5/CCND3/E2F2/TGFB2/PKMYT1/CDK6/CDKN2B/TGFB1/YWHAQ
hsa04145	hsa04145	Phagosome	137	0.463577203511443	2.4462059031614	1e-10	6.88e-09	4.25263157894737e-09	3804	tags=53%, list=24%, signal=41%	TUBA1C/DYNC1H1/TUBA1B/TAP1/HLA-DQB2/HLA-DRA/HLA-DPA1/MPO/ACTB/HLA-DQB1/ITGB3/HLA-F/ITGA2/HLA-A/SEC61G/RAB7B/CTSL/ATP6V0B/TUBB6/STX12/ITGB2/HLA-G/HLA-B/FCGR3B/MARCO/HLA-DQA1/ITGAV/ATP6V1H/VAMP3/THBS1/CTSS/HGS/TUBB4B/ATP6V1B2/HLA-C/TUBB3/TCIRG1/NCF1/ITGB5/STX18/HLA-DOB/HLA-DMB/HLA-DPB1/COMP/THBS2/NCF2/ITGA5/M6PR/HLA-DMA/MRC1/ATP6V0C/TLR4/ATP6V1E1/FCGR2A/CLEC7A/CORO1A/TLR6/HLA-DOA/TUBB/DYNC1I2/HLA-E…
hsa05166	hsa05166	Human T-cell leukemia virus 1 infection	216	0.412355535266347	2.33542921844093	1e-10	6.88e-09	4.25263157894737e-09	2979	tags=41%, list=19%, signal=34%	BUB1B/MAD2L1/CDC20/CCNB2/CCNA2/CHEK1/PTTG1/ESPL1/VDAC2/HRAS/BUB3/CDKN2A/CCNE1/IL2RA/SLC25A5/RAN/MAD1L1/HLA-DQB2/CCND1/RANBP1/ANAPC7/HLA-DRA/HLA-DPA1/VDAC3/TGFB3/CCNE2/BCL2L1/HLA-DQB1/RELB/CDK4/HLA-F/IL2RB/HLA-A/E2F3/MSX1/CDKN1A/IL2RG/ANAPC15/CD4/CHEK2/ITGB2/TP53/PIK3R2/HLA-G/HLA-B/TSPO/CDKN2C/CD3G/BAX/SLC2A1/HLA-DQA1/ANAPC5/CCND3/E2F2/MAPK9/TGFB2/NFKB2/SLC25A6/ADCY2/GPS2/HLA-C/MSX2/TLN1/JAK3/ITGA…
hsa03030	hsa03030	DNA replication	36	0.674683348912736	2.68064957996241	8.67022e-10	4.97092593248588e-08	3.07260415655492e-08	1683	tags=53%, list=11%, signal=47%	MCM2/MCM7/MCM4/RNASEH2A/MCM6/MCM5/LIG1/PCNA/POLA2/FEN1/RFC4/POLD1/RFC3/PRIM2/POLE4/RFC2/MCM3/POLA1/RPA1
hsa04142	hsa04142	Lysosome	127	0.434380889966786	2.25731522655567	2.3684e-08	1.01841221796158e-06	6.2949592419902e-07	2827	tags=46%, list=18%, signal=39%	GLA/FUCA2/HYAL3/CTSA/NAGPA/AP3B1/CTSW/CLTB/AP1M2/LAMP3/AP1S1/HEXA/AP4M1/AP1S3/CTSL/LIPA/ATP6V0B/NEU1/CD63/DNASE2B/NPC1/CTSD/ARSG/ACP5/ATP6V1H/GGA3/CTSS/CLTA/AP1G2/AP1M1/AP1B1/GM2A/CTSB/CTSG/SLC11A1/TCIRG1/DNASE2/HGSNAT/LAPTM5/MCOLN1/SGSH/CTSE/GGA1/AP3M2/SORT1/HEXB/IDUA/PSAP/MAN2B1/CTSV/M6PR/ATP6V0C/CTSC/CTSZ/GNPTAB/PPT1/DMXL2/ASAH1/LGMN
hsa05169	hsa05169	Epstein-Barr virus infection	191	0.384460002212503	2.13450720398343	2.09575e-08	1.01841221796158e-06	6.2949592419902e-07	3977	tags=46%, list=25%, signal=35%	CCNA2/PSMD14/MAPK13/CCNE1/TAP1/CD247/HLA-DQB2/CCND1/HLA-DRA/HLA-DPA1/DDB2/SAP30/CCNE2/IRF3/HLA-DQB1/RELB/CDK4/CASP8/HLA-F/PSMC4/TAPBP/PSMD8/PSMD2/HLA-A/E2F3/CDKN1A/IKBKE/MDM2/PSMD4/TP53/APAF1/PIK3R2/HLA-G/IRAK1/HLA-B/CXCL10/CD3G/BAX/HLA-DQA1/CCND3/E2F2/OAS3/MAPK9/NFKB2/BAK1/HLA-C/OAS2/JAK3/ITGAL/CDK6/LYN/HLA-DOB/RUNX3/HLA-DMB/HLA-DPB1/VIM/TYK2/PSMC1/HLA-DMA/CD44/BTK/NFKBIE/CD3D/MYC/ISG15/HLA-DOA/…
hsa05332	hsa05332	Graft-versus-host disease	34	0.656954331039391	2.55572111025169	2.81243e-08	1.07497307434451e-06	6.64457041057502e-07	2995	tags=71%, list=19%, signal=58%	GZMB/PRF1/HLA-DQB2/CD80/HLA-DRA/HLA-DPA1/HLA-DQB1/HLA-F/KIR3DL3/HLA-A/HLA-G/HLA-B/HLA-DQA1/HLA-C/KLRD1/HLA-DOB/HLA-DMB/HLA-DPB1/HLA-DMA/HLA-DOA/IL1A/KIR3DL1/HLA-E/CD86
hsa05203	hsa05203	Viral carcinogenesis	162	0.380263796299171	2.0541493832232	1.44879e-07	4.98383817549981e-06	3.08058540835668e-06	4470	tags=46%, list=28%, signal=33%	CDC20/CCNA2/CDK1/CHEK1/HRAS/CDKN2A/CCNE1/MAD1L1/CCND1/RANBP1/YWHAZ/VDAC3/CCNE2/IRF3/CDK4/SRC/CASP8/HLA-F/HLA-A/CDKN1A/MDM2/PKM/TP53/PIK3R2/HLA-G/TRAF1/HLA-B/CCR5/BAX/CCND3/NFKB2/BAK1/HLA-C/ACTN1/JAK3/CDK6/CDKN2B/LYN/CHD4/CREB5/YWHAQ/PSMC1/YWHAB/IKBKG/PMAIP1/GTF2H3/PIK3CD/HLA-E/SCRIB/TRAF5/HDAC9/HDAC7/GRB2/RBL1/STAT5A/ATP6V0D1/RB1/SYK/HDAC2/TRADD/PIK3R3/MAPKAPK2/CCR8/MAPK3/GTF2E1/KAT2A/HNRNPK/RBPJ…
hsa05171	hsa05171	Coronavirus disease - COVID-19	202	0.363683084287221	2.03618274290536	2.77432e-07	8.6760535131798e-06	5.36279929517234e-06	4018	tags=48%, list=25%, signal=36%	MMP1/RPLP0/RPL6/MAPK13/ACE2/RPL22L1/IRF3/RPS5/MMP3/ACE/RPL35/FAU/RPS6/RPL8/CFD/IKBKE/RPL29/RPL26L1/RPS24/RPS15/C1QC/C5AR1/PIK3R2/IRAK1/RPS27L/RPS9/RPL3/CXCL10/RPS3/RPL19/RPL41/RPS18/OAS3/MAPK9/RPL15/RPL37/OAS2/RPS17/RPL36/RPL27/RPL24/RPL32/RPL14/RPS23/RPS10/RPL35A/RPL12/RPS21/RPS12/RPS14/RPS27A/RPL22/RPS28/TYK2/CASP1/RPL38/UBA52/RPS15A/TLR4/FCGR2A/CXCL8/RPS16/ISG15/C1QA/RPL7/C1QB/IKBKG/PRKCB/IFNA…
hsa05020	hsa05020	Prion disease	230	0.336095309328217	1.90750217283413	6.36068e-07	1.82339570058099e-05	1.12706833389645e-05	3614	tags=36%, list=23%, signal=28%	CSNK2B/VDAC2/PSMD14/MCU/NDUFS7/KLC2/TUBA1C/TUBA1B/MAPK13/CCL5/SLC25A5/NDUFA7/UQCR10/VDAC3/UQCRB/PSMB2/PSMB3/COX4I1/COX8A/PSMC4/HSPA6/CSNK2A1/PSMD8/PSMD2/NDUFA1/NDUFS3/NDUFA9/ITPR3/TUBB6/C1QC/PSMD4/APAF1/UQCRC2/PIK3R2/NDUFB1/NDUFB2/CACNA1S/COX6B1/PSMA4/BAX/MAPK9/SLC25A6/TUBB4B/NDUFB7/NDUFA13/PSMB4/TUBB3/COX4I2/NCF1/STIP1/PPP3CC/COX6A1/CREB5/PPP3CB/NDUFA3/NCF2/RAC2/PSMC1/NDUFB11/COX5B/NDUFC1/C1QA/U…
hsa05416	hsa05416	Viral myocarditis	63	0.50413950166208	2.31819694243333	1.04626e-06	2.76856732614723e-05	1.71129314529296e-05	3235	tags=51%, list=20%, signal=41%	PRF1/DTNA/HLA-DQB2/CCND1/CD80/HLA-DRA/HLA-DPA1/ACTB/HLA-DQB1/CASP8/HLA-F/HLA-A/EIF4G3/ITGB2/HLA-G/HLA-B/HLA-DQA1/LAMA1/HLA-C/ITGAL/HLA-DOB/HLA-DMB/HLA-DPB1/RAC2/SGCB/HLA-DMA/HLA-DOA/FYN/HLA-E/CD86/ABL1/EIF4G2
hsa05323	hsa05323	Rheumatoid arthritis	84	0.451048481085179	2.19211445889905	1.28799e-06	3.13904595644486e-05	1.94029156426519e-05	3186	tags=46%, list=20%, signal=37%	MMP1/CCL20/CCL5/CTLA4/HLA-DQB2/CD80/HLA-DRA/HLA-DPA1/TGFB3/CXCL5/HLA-DQB1/MMP3/CTSL/ATP6V0B/ITGB2/IL18/HLA-DQA1/ACP5/ATP6V1H/TGFB2/ATP6V1B2/TCIRG1/ITGAL/TGFB1/HLA-DOB/HLA-DMB/HLA-DPB1/CXCL6/HLA-DMA/LTB/ATP6V0C/TLR4/ATP6V1E1/CXCL8/HLA-DOA/IL1A/CD86/ANGPT1/TNFSF13B
hsa05012	hsa05012	Parkinson disease	223	0.333279855612549	1.89021283127755	1.36877e-06	3.13904595644486e-05	1.94029156426519e-05	3614	tags=37%, list=23%, signal=29%	UCHL1/VDAC2/PSMD14/MCU/NDUFS7/KLC2/TUBA1C/TUBA1B/TXN/SLC25A5/NDUFA7/GNAL/UQCR10/VDAC3/UQCRB/BCL2L1/PSMB2/PSMB3/COX4I1/COX8A/PSMC4/PSMD8/PSMD2/NDUFA1/NDUFS3/NDUFA9/ITPR3/TRAP1/TUBB6/PSMD4/TP53/UBE2L3/APAF1/UQCRC2/NDUFB1/GNAS/NDUFB2/GNAI2/COX6B1/SLC39A10/PSMA4/BAX/MAPK9/SLC25A6/TUBB4B/NDUFB7/NDUFA13/PSMB4/TUBB3/COX4I2/CALML4/UBA1/COX6A1/DAXX/NDUFA3/RPS27A/CALML5/PSMC1/SLC39A4/HTRA2/NDUFB11/UBA52/CO…
hsa04115	hsa04115	p53 signaling pathway	72	0.474077289406862	2.22289583254326	1.94304e-06	4.17753989572478e-05	2.58220030274298e-05	1876	tags=40%, list=12%, signal=36%	TP53I3/CCNB1/CCNB2/RRM2/CDK1/CHEK1/SFN/GTSE1/CDKN2A/CCNE1/CCND1/TNFRSF10A/DDB2/CCNE2/BCL2L1/CDK4/CASP8/CDKN1A/MDM2/CHEK2/TP53/APAF1/SESN1/BAX/CCND3/AIFM2/THBS1/SHISA5/CDK6
hsa04218	hsa04218	Cellular senescence	152	0.377104900232689	2.01691590706887	2.16633e-06	4.38363526025288e-05	2.70959095033991e-05	2979	tags=39%, list=19%, signal=32%	CCNB1/FOXM1/CCNB2/CCNA2/CDK1/CHEK1/VDAC2/HRAS/CDC25A/MCU/MYBL2/TRAF3IP2/SQSTM1/MAPK13/CDKN2A/CCNE1/SLC25A5/CCND1/PPP1CA/KIR2DL4/VDAC3/TGFB3/CCNE2/LIN37/CDK4/HLA-F/ITPR3/HLA-A/E2F3/CDKN1A/MDM2/CHEK2/TP53/PIK3R2/HLA-G/HLA-B/CAPN2/LIN54/CCND3/E2F2/TGFB2/SLC25A6/HLA-C/CDK6/CDKN2B/CALML4/TGFB1/MAP2K2/PPP3CC/PPP3CB/CALML5/EIF4EBP1/ETS1/ATM/CXCL8/MYC/CALML3/IL1A/PIK3CD/HLA-E
hsa04514	hsa04514	Cell adhesion molecules	143	0.374540139567104	1.97361812881434	2.29681e-06	4.38946822658564e-05	2.71319639464596e-05	3492	tags=40%, list=22%, signal=31%	CLDN4/CTLA4/HLA-DQB2/CLDN7/CD276/SELL/CD80/HLA-DRA/HLA-DPA1/CLDN2/HLA-DQB1/ICOS/HLA-F/CD6/ITGA6/HLA-A/CD8A/CD4/CDH15/ITGB2/HLA-G/HLA-B/TIGIT/ITGA4/HLA-DQA1/ITGAV/NRCAM/CD99/MPZ/HLA-C/ITGB7/CDH4/ITGAL/GLG1/HLA-DOB/HLA-DMB/HLA-DPB1/PTPRC/CD2/CD226/SDC3/VCAN/HLA-DMA/CLDN3/PDCD1/HLA-DOA/CLDN15/ICAM2/SELP/HLA-E/CD86/SIGLEC1/VTCN1/SELPLG/ITGA9/ITGAM/PECAM1
hsa04940	hsa04940	Type I diabetes mellitus	39	0.562577832714994	2.27339225384849	3.44911e-06	6.24471115662849e-05	3.85994998053536e-05	3357	tags=56%, list=21%, signal=45%	GZMB/PRF1/HLA-DQB2/CD80/HLA-DRA/HLA-DPA1/HLA-DQB1/HLA-F/HLA-A/HLA-G/HLA-B/HLA-DQA1/HLA-C/HLA-DOB/HLA-DMB/HLA-DPB1/HLA-DMA/HLA-DOA/IL1A/HLA-E/CD86/CPE
hsa05140	hsa05140	Leishmaniasis	70	0.455120011861147	2.12029467615256	6.94483e-06	0.000119451035640257	7.38344834740878e-05	4279	tags=56%, list=27%, signal=41%	MAPK13/HLA-DQB2/HLA-DRA/HLA-DPA1/TGFB3/HLA-DQB1/IFNGR1/ITGB2/IRAK1/FCGR3B/ITGA4/HLA-DQA1/TGFB2/EEF1A2/NCF1/TGFB1/HLA-DOB/HLA-DMB/HLA-DPB1/NCF2/HLA-DMA/TLR4/PTPN6/FCGR2A/CR1/HLA-DOA/IL1A/PRKCB/IRAK4/CYBB/IFNGR2/NCF4/ITGAM/PTGS2/CYBA/MAPK3/MARCKSL1/NFKBIB/ITGB1
hsa04613	hsa04613	Neutrophil extracellular trap formation	106	0.395707928897036	1.98002953086024	9.68522e-06	0.000158653095518492	9.80658668749552e-05	4012	tags=49%, list=25%, signal=37%	VDAC2/MAPK13/SLC25A5/VDAC3/ELANE/MPO/ACTB/ITGB3/SRC/HMGB1/FPR1/FPR2/C5AR1/ITGB2/PIK3R2/ATG7/FCGR3B/SLC25A6/CTSG/ITGAL/NCF1/MAP2K2/AZU1/NCF2/RAC2/CASP1/SIGLEC9/TLR4/FCGR2A/CR1/CLEC7A/FPR3/PRKCB/SELP/PIK3CD/TLR8/HDAC9/CYBB/HDAC7/PLCG1/NCF4/SELPLG/TLR7/ITGAM/PLCB2/SYK/CYBA/HDAC2/PLCB3/PIK3R3/PLCG2/MAPK3
hsa05132	hsa05132	Salmonella infection	239	0.309675625454244	1.76476231355498	1.35338e-05	0.000211619485967282	0.000130805190224575	4082	tags=39%, list=25%, signal=30%	GAPDH/HRAS/KLC2/TUBA1C/DYNC1H1/TUBA1B/TXN/MAPK13/ANXA2/PFN1/TNFRSF10A/S100A10/ACTB/MYL12B/CASP8/RIPK2/DYNLT1/BRK1/RALA/MYL12A/RAB7B/TUBB6/IL18/IRAK1/CYTH2/LEF1/RPS3/BAX/DCTN2/MAPK9/ARPC1B/PIK3CG/TUBB4B/BAK1/ARPC5/TCF7/TUBB3/HSP90AB1/CASP5/NAIP/MAP2K2/FLNA/RHOG/PTPRC/ARPC4/PAK1/CASP1/CSE1L/M6PR/PLEKHM2/DYNLRB1/MYL9/PKN1/RIPK3/ACTR1A/TLR4/ARPC3/NLRC4/CXCL8/CYTH4/MYC/CYTH1/TLR6/DYNLL1/IKBKG/TUBB/VPS…
hsa03008	hsa03008	Ribosome biogenesis in eukaryotes	66	0.464309949544877	2.1322359153501	1.47005e-05	0.000219868035560116	0.000135903742910476	1910	tags=38%, list=12%, signal=34%	FBL/CSNK2B/GNL2/EIF6/SPATA5/UTP14A/NOB1/FBLL1/NHP2/RAN/GNL3L/CSNK2A1/TCOF1/WDR75/NAT10/RRP7A/NOP58/BMS1/NXT1/NOP10/WDR43/RPP30/GAR1/RPP40/DROSHA
hsa05152	hsa05152	Tuberculosis	168	0.3385194163644	1.84209189776572	2.33329e-05	0.00033443883094862	0.000206721676412549	3912	tags=42%, list=24%, signal=32%	MAPK13/HLA-DQB2/ITGAX/HLA-DRA/HLA-DPA1/TGFB3/HLA-DQB1/CD74/SRC/CASP8/LSP1/RIPK2/ATP6V0B/IFNGR1/ITGB2/IL18/APAF1/CLEC4E/IRAK1/CTSD/FCGR3B/BAX/HLA-DQA1/RFX5/ATP6V1H/RFXANK/CTSS/MAPK9/TGFB2/KSR1/TCIRG1/VDR/CALML4/TGFB1/PPP3CC/HLA-DOB/HLA-DMB/HLA-DPB1/PPP3CB/CALML5/CASP10/HLA-DMA/MRC1/CIITA/ATP6V0C/SPHK1/TLR4/FCGR2A/CR1/FCER1G/CLEC7A/CORO1A/TLR6/HLA-DOA/PLK3/CALML3/IL1A/IL10RA/IRAK4/IFNGR2/IL10RB/ITG…
hsa05170	hsa05170	Human immunodeficiency virus 1 infection	196	0.323074081437002	1.80370510262583	2.52325e-05	0.000347199200393067	0.000214609052874539	3164	tags=34%, list=20%, signal=28%	CCNB1/CCNB2/CDK1/CHEK1/HRAS/CFL1/CDC25C/MAPK13/TAP1/CD247/APOBEC3B/IRF3/BCL2L1/AP1M2/CASP8/HLA-F/AP1S1/TAPBP/RNF7/GNB1/ITPR3/AP1S3/HLA-A/TNFRSF1B/CD4/RBX1/PIK3R2/HLA-G/IRAK1/HLA-B/CCR5/GNAI2/APOBEC3F/GNG8/CD3G/BAX/CXCR4/MAPK9/BAK1/AP1G2/AP1M1/HLA-C/AP1B1/GNG5/PTK2B/CALML4/MAP2K2/PPP3CC/PPP3CB/PAK1/RAC2/APOBEC3G/CALML5/ATM/APOBEC3C/CD3D/TLR4/IKBKG/CALML3/PRKCB/PIK3CD/HLA-E/TRAF5/TAP2/IRAK4/GNB4/PL…
hsa04814	hsa04814	Motor proteins	178	0.327460527779262	1.80703898191791	2.84077e-05	0.000375855600265906	0.000232322005060322	2912	tags=30%, list=18%, signal=25%	KIF20A/KIF23/KIF18B/KIF4A/KIF11/CENPE/KIF22/KIF2C/KLC2/TUBA1C/KIF14/DYNC1H1/TUBA1B/KIF21B/KIF15/KIF18A/TPM3/KIFC1/TUBG1/TPM1/ACTB/MYH9/MYL12B/KIF9/MYO1C/DNAH12/DYNLT1/CAPZA1/MYL12A/KIF2A/MYO9B/KIF20B/TUBB6/DCTN2/MYO1G/TUBB4B/TUBB3/KIF7/KIF3A/CAPZB/MYL6/TPM4/KIF3C/MYH13/MYL4/DYNLRB1/MYL9/TNNI2/ACTR1A/ACTG2/DYNLL1/ACTA2/TUBB/DYNC1I2
hsa00640	hsa00640	Propanoate metabolism	31	-0.560793	-2.18789	3.32024e-05	0.000423023675695627	0.00026147730260256	4491	tags=77%, list=28%, signal=56%	DLD/LDHAL6B/MLYCD/PCCB/ACSS3/LDHA/BCKDHB/ECHS1/LDHC/SUCLA2/ACACA/ABAT/ALDH6A1/ECHDC1/EHHADH/ACOX1/BCKDHA/HIBCH/PCCA/SUCLG2/ACADS/ACACB/ACSS2/MCEE
hsa04146	hsa04146	Peroxisome	82	-0.39678	-1.99102	3.60792e-05	0.000443258640748814	0.000273984839140944	4655	tags=57%, list=29%, signal=41%	SLC27A2/CROT/AGPS/MLYCD/HACL1/IDH2/SLC25A17/PEX11A/ECI2/HSD17B4/EPHX2/SOD1/CAT/DECR2/HMGCL/PEX11G/ACSL1/PEX5L/XDH/PEX3/AMACR/ACOX2/PHYH/PXMP2/AGXT/SCP2/EHHADH/ACOX1/DDO/PIPOX/DAO/HAO1/NUDT7/NUDT12/PEX13/HAO2/PEX1/NUDT13/PEX16/PEX5/SOD2/HMGCLL1/NOS2/ABCD2/PEX2/PEX12/PAOX
hsa05320	hsa05320	Autoimmune thyroid disease	46	0.499054178631313	2.11092066248097	5.26712e-05	0.000624789911836779	0.000386192050768144	2995	tags=48%, list=19%, signal=39%	GZMB/PRF1/CTLA4/HLA-DQB2/CD80/HLA-DRA/HLA-DPA1/HLA-DQB1/HLA-F/HLA-A/HLA-G/HLA-B/HLA-DQA1/HLA-C/HLA-DOB/HLA-DMB/HLA-DPB1/HLA-DMA/CGA/HLA-DOA/HLA-E/CD86
hsa05330	hsa05330	Allograft rejection	33	0.560316514861052	2.16787282424059	5.91656e-05	0.000636030315143604	0.000393139913277259	2995	tags=61%, list=19%, signal=49%	GZMB/PRF1/HLA-DQB2/CD80/HLA-DRA/HLA-DPA1/HLA-DQB1/HLA-F/HLA-A/HLA-G/HLA-B/HLA-DQA1/HLA-C/HLA-DOB/HLA-DMB/HLA-DPB1/HLA-DMA/HLA-DOA/HLA-E/CD86
hsa03410	hsa03410	Base excision repair	42	0.508425613229993	2.10681673305446	5.73591e-05	0.000636030315143604	0.000393139913277259	882	tags=31%, list=6%, signal=29%	LIG1/TDP1/PCNA/FEN1/RFC4/MBD4/POLD1/RFC3/APEX1/POLE4/HMGB1/NEIL3/RFC2
hsa04061	hsa04061	Viral protein interaction with cytokine and cytokine receptor	92	0.396891319717137	1.94618331004299	5.63786e-05	0.000636030315143604	0.000393139913277259	5276	tags=59%, list=33%, signal=40%	CCL20/CCL5/IL2RA/CXCL9/CXCL11/CCL13/TNFRSF10A/CXCL5/PPBP/IL2RB/CCL21/IL2RG/CX3CL1/PF4/TNFRSF1B/IL18/CCR5/CXCL10/CXCR4/ACKR3/IL18RAP/CCR7/CXCL6/CCL18/CCR2/CXCL8/CSF1R/IL20RA/IL10RA/CCL24/CCR1/ACKR4/IL10RB/CCL23/CXCL1/TNFRSF14/CCL19/CXCR3/PF4V1/CCR8/CXCL14/CCR3/CCR4/CXCL3/CXCR2/XCR1/CCR6/CCR10/TNFRSF10C/IL10/CCL28/CCL4/CCL1/IL6
hsa04512	hsa04512	ECM-receptor interaction	86	0.391761971619795	1.91201379108652	6.73219e-05	0.000661677974021137	0.000408993117357007	4447	tags=48%, list=28%, signal=35%	HMMR/ITGB3/LAMB3/ITGA6/ITGA2/COL4A1/ITGA3/ITGA4/ITGAV/LAMA1/LAMA3/THBS1/COL4A2/ITGB7/ITGB5/COL6A2/AGRN/LAMA5/RELN/COMP/THBS2/ITGA5/TNC/CD44/COL6A1/SPP1/CD47/COL1A1/ITGA11/COL1A2/ITGB4/LAMC2/ITGA9/CD36/LAMB1/COL2A1/LAMC3/LAMC1/ITGB1/HSPG2/ITGA2B
hsa05415	hsa05415	Diabetic cardiomyopathy	169	0.324258666974189	1.76716249977189	6.59611e-05	0.000661677974021137	0.000408993117357007	3853	tags=38%, list=24%, signal=30%	GAPDH/VDAC2/NDUFS7/GSR/MAPK13/SLC25A5/NDUFA7/PDHA1/UQCR10/PPP1CA/VDAC3/G6PD/TGFB3/UQCRB/COX4I1/COX8A/ACE/NDUFA1/NDUFS3/NDUFA9/UQCRC2/PIK3R2/NDUFB1/NDUFB2/COX6B1/CTSD/SLC2A1/ATP2A3/MMP9/MAPK9/TGFB2/SLC25A6/NDUFB7/NDUFA13/PDK4/COX4I2/NCF1/TGFB1/COX6A1/NDUFA3/NCF2/RAC2/NDUFB11/COX5B/GYS1/NDUFC1/UQCRFS1/UQCR11/COL1A1/PRKCB/COL1A2/PIK3CD/CYBB/NDUFV1/NCF4/PRKCD/NDUFB8/PDHA2/CD36/PLCB2/COX7B/NDUFB10/CYB…
hsa04144	hsa04144	Endocytosis	230	0.300175927666349	1.70364244416425	6.37624e-05	0.000661677974021137	0.000408993117357007	4794	tags=43%, list=30%, signal=31%	HRAS/NEDD4L/IL2RA/AP2B1/SMAP1/PIP5K1C/CLTB/RAB11FIP4/SRC/HLA-F/HSPA6/RAB11FIP3/IL2RB/RNF41/CAPZA1/ARF3/EPS15L1/MVB12A/VPS35/ARF5/HLA-A/MDM2/SMAP2/IL2RG/CBL/HLA-G/HLA-B/DNAJC6/CYTH2/CCR5/AGAP9/ARRB2/CXCR4/PML/VPS25/CHMP1A/CLTA/HGS/ARPC1B/ARPC5/HLA-C/RAB31/CAPZB/ACAP1/SNX5/AP2A2/RAB11A/CBLB/ARPC4/FOLR1/RAB35/GRK6/CHMP2A/VPS37B/ASAP1/ARAP1/EHD4/EHD1/ARPC3/CYTH4/AP2S1/CYTH1/HLA-E/WIPF2/FOLR2/IST1/RUF…
hsa05145	hsa05145	Toxoplasmosis	103	0.378566217267749	1.89788253128275	7.5535e-05	0.000721778473129838	0.00044614214067389	4279	tags=48%, list=27%, signal=35%	MAPK13/HLA-DQB2/HLA-DRA/HLA-DPA1/TGFB3/BCL2L1/HLA-DQB1/CASP8/HSPA6/LAMB3/ITGA6/IFNGR1/IRAK1/CCR5/GNAI2/HLA-DQA1/LAMA1/LAMA3/MAPK9/TGFB2/PIK3CG/TGFB1/PIK3R6/HLA-DOB/HLA-DMB/HLA-DPB1/LAMA5/TYK2/HLA-DMA/CIITA/TLR4/PIK3R5/HLA-DOA/IKBKG/IL10RA/IRAK4/IFNGR2/ALOX5/LAMC2/IL10RB/LY96/LAMB1/BIRC7/BCL2/MAPK3/LAMC3/LAMC1/NFKBIB/ITGB1
hsa01232	hsa01232	Nucleotide metabolism	75	0.421174759195947	1.99366727378192	7.87168e-05	0.000731853788911573	0.000452369845043261	2817	tags=39%, list=18%, signal=32%	TYMS/RRM1/RRM2/TK1/ADSL/DTYMK/DCTPP1/NME1/IMPDH2/APRT/NT5M/ENTPD6/DUT/UPP1/TYMP/ADA/AK1/UPP2/ITPA/CANT1/AK2/NT5C2/GUK1/NT5C/HDDC2/NTPCR/IMPDH1/DGUOK/NT5C3A
hsa04650	hsa04650	Natural killer cell mediated cytotoxicity	114	0.370021306116032	1.88675296884257	8.10135e-05	0.000733385291685591	0.000453316489964778	4453	tags=51%, list=28%, signal=37%	GZMB/HRAS/PRF1/CD247/TNFRSF10A/KIR2DL4/SH2D1B/HLA-A/MICB/KLRC3/ZAP70/IFNGR1/ITGB2/PIK3R2/HLA-G/HLA-B/FCGR3B/HLA-C/KLRD1/PTK2B/ITGAL/MAP2K2/PPP3CC/VAV1/PPP3CB/LCK/PAK1/RAC2/CD48/ULBP3/SH2D1A/PTPN6/FCER1G/LCP2/ICAM2/FYN/PRKCB/KIR3DL1/LAT/IFNAR2/CD244/PIK3CD/HLA-E/TYROBP/PLCG1/IFNGR2/GRB2/ULBP2/HCST/NCR3/SYK/PIK3R3/PLCG2/MAPK3/FASLG/ICAM1/KIR2DL3/NRAS
hsa04640	hsa04640	Hematopoietic cell lineage	92	0.388098102887477	1.9030651792467	0.000115285	0.00101686995379028	0.000628542627495825	2866	tags=38%, list=18%, signal=31%	IL2RA/HLA-DQB2/HLA-DRA/HLA-DPA1/HLA-DQB1/ITGB3/CD7/ITGA6/ITGA2/CD8A/ITGA3/CD4/CD3G/ITGA4/HLA-DQA1/MS4A1/CD37/CSF2RA/CSF3R/CD33/CD38/HLA-DOB/HLA-DMB/HLA-DPB1/CD2/ITGA5/HLA-DMA/CD44/CD3D/CR1/CD24/HLA-DOA/CD19/CSF1R/IL1A
hsa00280	hsa00280	Valine, leucine and isoleucine degradation	47	-0.468063	-2.02787	0.000120939	0.00104007220030466	0.000642884285378031	4595	tags=68%, list=29%, signal=49%	HMGCS2/DLD/ALDH3A2/PCCB/AOX1/BCKDHB/AGXT2/ACAT1/ECHS1/MCCC2/HMGCL/HIBADH/ACAD8/ALDH1B1/MCCC1/ACAT2/ABAT/ALDH6A1/IVD/HADH/EHHADH/ALDH2/ALDH7A1/BCKDHA/ACADSB/HIBCH/PCCA/ACADS/ALDH9A1/AUH/HMGCLL1/MCEE
hsa05340	hsa05340	Primary immunodeficiency	36	0.507930692985348	2.01810849637153	0.000153707	0.00128963807153237	0.000797144707617928	3052	tags=53%, list=19%, signal=43%	TAP1/ICOS/IL2RG/CD8A/ZAP70/ADA/CD4/RFX5/RFXANK/JAK3/PTPRC/LCK/BTK/CIITA/CD3D/CD19/IKBKG/DCLRE1C/TAP2
hsa00120	hsa00120	Primary bile acid biosynthesis	17	-0.662959	-2.1693	0.000165907	0.00130423730471334	0.000806168713439702	3894	tags=76%, list=24%, signal=58%	HSD17B4/AKR1C4/AMACR/ACOX2/CYP27A1/SLC27A5/SCP2/CYP8B1/AKR1D1/CYP7B1/CYP39A1/CYP7A1/CYP46A1
hsa03440	hsa03440	Homologous recombination	37	0.502316750955391	2.02793049127507	0.000174404	0.00130423730471334	0.000806168713439702	2494	tags=41%, list=16%, signal=34%	RAD54L/RAD51/BRIP1/RBBP8/POLD1/BABAM1/BRCA2/TOP3B/RAD51D/BLM/XRCC2/RPA1/XRCC3/MUS81/ATM
hsa04658	hsa04658	Th1 and Th2 cell differentiation	88	0.387193729902302	1.89480841160397	0.000173495	0.00130423730471334	0.000806168713439702	3448	tags=43%, list=22%, signal=34%	MAPK13/IL2RA/CD247/HLA-DQB2/HLA-DRA/HLA-DPA1/HLA-DQB1/IL2RB/IL2RG/ZAP70/CD4/IFNGR1/CD3G/HLA-DQA1/TBX21/MAPK9/JAK3/PPP3CC/HLA-DOB/IL12RB1/RUNX3/HLA-DMB/HLA-DPB1/PPP3CB/LCK/TYK2/STAT4/HLA-DMA/NFKBIE/CD3D/HLA-DOA/IKBKG/LAT/PLCG1/IFNGR2/PRKCQ/GATA3/STAT5A
hsa05222	hsa05222	Small cell lung cancer	92	0.381547704942397	1.87094486186627	0.000172433	0.00130423730471334	0.000806168713439702	4279	tags=48%, list=27%, signal=35%	CKS2/CCNE1/CCND1/DDB2/CCNE2/BCL2L1/CDK4/LAMB3/ITGA6/ITGA2/E2F3/COL4A1/CDKN1A/ITGA3/TP53/APAF1/PIK3R2/TRAF1/BAX/ITGAV/E2F2/LAMA1/LAMA3/BAK1/COL4A2/CDK6/CDKN2B/LAMA5/MYC/MAX/IKBKG/PIK3CD/TRAF5/LAMC2/PTGS2/E2F1/LAMB1/RB1/BIRC7/PIK3R3/BCL2/LAMC3/LAMC1/ITGB1
hsa05168	hsa05168	Herpes simplex virus 1 infection	163	0.32107585366196	1.7325620703584	0.0001644	0.00130423730471334	0.000806168713439702	3075	tags=34%, list=19%, signal=28%	CCL5/TAP1/HLA-DQB2/PPP1CA/HLA-DRA/HLA-DPA1/EIF2B2/IRF3/BCL2L1/HLA-DQB1/CD74/ALYREF/ITGB3/SRC/CASP8/HLA-F/TAPBP/HLA-A/SRPK1/IKBKE/IFNGR1/TP53/APAF1/PIK3R2/HLA-G/IRAK1/HLA-B/BAX/HLA-DQA1/PML/OAS3/EIF2B4/BAK1/HLA-C/OAS2/POU2F2/CFP/PILRA/DAXX/HLA-DOB/HLA-DMB/HLA-DPB1/ITGA5/TYK2/EIF4EBP1/HLA-DMA/NXF3/HLA-DOA/IKBKG/IFNAR2/PIK3CD/HLA-E/TRAF5/TAP2/IRAK4
hsa03050	hsa03050	Proteasome	42	0.482142009579197	1.9979025978584	0.00024359	0.00178287229415069	0.00110202020629877	3614	tags=45%, list=23%, signal=35%	PSMD14/POMP/PSME1/PSMB2/PSMB3/PSMB9/PSMC4/PSMD8/PSMD2/PSMB10/PSMD4/PSMA4/PSMB4/PSMC1/PSMB8/PSMB6/ADRM1/PSME3/PSMA5
hsa05164	hsa05164	Influenza A	156	0.322597095521615	1.73171608358144	0.000264467	0.0018953480016786	0.0011715431344525	4310	tags=42%, list=27%, signal=31%	KPNA2/CCL5/SLC25A5/HLA-DQB2/TNFRSF10A/HLA-DRA/HLA-DPA1/ACTB/IRF3/HLA-DQB1/CDK4/CASP8/IKBKE/IFNGR1/IL18/APAF1/PIK3R2/CXCL10/BAX/HLA-DQA1/CCND3/PML/OAS3/SLC25A6/BAK1/NXT1/OAS2/CDK6/MAP2K2/HLA-DOB/RAB11A/HLA-DMB/HLA-DPB1/TYK2/CASP1/HNRNPUL1/HLA-DMA/CIITA/NLRX1/TLR4/CXCL8/NXF3/HLA-DOA/IKBKG/IL1A/PRKCB/IFNAR2/PIK3CD/IRAK4/IFNGR2/MX1/TMPRSS4/TLR7/NLRP3/PYCARD/TPSAB1/MX2/TRADD/PIK3R3/FADD/MAPK3/FASLG/PR…
hsa05130	hsa05130	Pathogenic Escherichia coli infection	187	0.304487928487553	1.6850751895548	0.000273013	0.00191666500933434	0.00118471949781376	4279	tags=42%, list=27%, signal=31%	NCL/GAPDH/ABCF2/TUBA1C/TUBA1B/MAPK13/CLDN4/TNFRSF10A/CLDN7/CLDN2/ACTB/MYH9/SRC/BAIAP2L1/CASP8/MYO1C/GNA13/BRK1/TUBB6/IL18/IRAK1/CYTH2/CTTN/RPS3/BAX/MYO1G/ARHGEF1/F2R/LPAR2/MAPK9/ARPC1B/TUBB4B/BAK1/ARPC5/TUBB3/NAIP/ARPC4/PAK1/CASP1/WASF2/CLDN3/TLR4/PTPN6/FCGR2A/ARPC3/CXCL8/CYTH4/CYTH1/CLDN15/IKBKG/FYN/TUBB/WIPF2/MYO1F/IRAK4/ABL1/ARHGEF2/HCLS1/WIPF1/TUBA1A/EZR/NLRP3/PYCARD/NCKAP1L/LPAR5/TUBA4A/ARPC…
hsa05150	hsa05150	Staphylococcus aureus infection	74	0.397361669549605	1.87443600113809	0.000325701	0.00224082570952976	0.00138508810686968	3762	tags=50%, list=23%, signal=38%	KRT18/HLA-DQB2/HLA-DRA/HLA-DPA1/HLA-DQB1/FPR1/CFD/DEFA4/FPR2/KRT23/KRT19/C1QC/C5AR1/ITGB2/KRT36/FCGR3B/HLA-DQA1/KRT15/ITGAL/DEFB1/HLA-DOB/HLA-DMB/HLA-DPB1/HLA-DMA/FCGR2A/C1QA/HLA-DOA/C1QB/FPR3/PTAFR/SELP/C3AR1/SELPLG/ITGAM/FCGR2B/KRT14/KRT20
hsa04610	hsa04610	Complement and coagulation cascades	82	-0.363788	-1.82547	0.00034571	0.00233184512352526	0.00144134857696482	4256	tags=59%, list=27%, signal=43%	FGA/C8A/C4BPB/C8B/KNG1/SERPIND1/SERPINA1/FGG/C5/PROC/CPB2/F5/CFHR4/C4BPA/PLG/F12/FGB/CFHR3/F13B/SERPINF2/F2/F8/MASP2/CFB/SERPINC1/C9/F10/C3/MBL2/CFHR5/F7/F9/KLKB1/CLU/F11/CFI/C7/C6/CD46/CFH/PROS1/A2M/TFPI/C2/SERPING1/C1S/C1R/SERPINA5
hsa04950	hsa04950	Maturity onset diabetes of the young	24	-0.555779	-2.01208	0.000393695	0.00260444631680807	0.00160984747856558	4498	tags=54%, list=28%, signal=39%	PKLR/GCK/FOXA3/HNF4G/SLC2A2/IAPP/HES1/FOXA2/MNX1/NEUROD1/RFX6/HHEX/NR5A2
hsa05016	hsa05016	Huntington disease	263	0.275206408512196	1.58932258384736	0.000504053	0.00327158607378817	0.0020222166061971	3614	tags=30%, list=23%, signal=24%	VDAC2/PSMD14/NDUFS7/KLC2/TUBA1C/TUBA1B/POLR2G/SLC25A5/NDUFA7/UQCR10/POLR2L/AP2B1/VDAC3/STX1A/UQCRB/POLR2E/PSMB2/PSMB3/CLTB/COX4I1/COX8A/CASP8/PSMC4/PSMD8/PSMD2/NDUFA1/NDUFS3/DNAH12/NDUFA9/GPX3/HIP1/TUBB6/PSMD4/TP53/APAF1/UQCRC2/NDUFB1/NDUFB2/COX6B1/PSMA4/SLC1A3/BAX/DCTN2/GPX7/CLTA/MAPK9/SLC25A6/TUBB4B/NDUFB7/NDUFA13/PSMB4/TUBB3/KCNJ10/COX4I2/AP2A2/COX6A1/CREB5/NDUFA3/PSMC1/NDUFB11/ACTR1A/COX5B/ND…
hsa05322	hsa05322	Systemic lupus erythematosus	46	0.458095051820261	1.93766999991813	0.000517242	0.00329502388846987	0.00203670387231002	2995	tags=52%, list=19%, signal=43%	SNRPB/SNRPD1/SNRPD3/HLA-DQB2/CD80/HLA-DRA/HLA-DPA1/ELANE/HLA-DQB1/SSB/C1QC/FCGR3B/HLA-DQA1/ACTN1/CTSG/HLA-DOB/HLA-DMB/HLA-DPB1/HLA-DMA/FCGR2A/C1QA/HLA-DOA/C1QB/CD86
hsa04210	hsa04210	Apoptosis	128	0.333723115688914	1.73433048544686	0.000547846	0.00342652660675463	0.00211798768226572	4488	tags=46%, list=28%, signal=33%	BIRC5/GZMB/HRAS/LMNB1/PRF1/TUBA1C/TUBA1B/TNFRSF10A/ACTB/CTSW/BCL2L1/CASP8/ITPR3/SPTAN1/LMNB2/CTSL/TP53/APAF1/PIK3R2/TRAF1/CAPN2/CTSD/BAX/CTSS/MAPK9/BAK1/LMNA/CTSB/MAP2K2/DAXX/CASP2/PARP2/CTSV/CASP10/CSF2RB/HTRA2/ATM/CTSC/CTSZ/BCL2A1/CFLAR/IKBKG/PMAIP1/PIK3CD/TUBA1A/TUBA4A/TP53AIP1/TRADD/PIK3R3/FADD/BCL2/HRK/MCL1/MAPK3/FASLG/PIDD1/NRAS/IL3RA/BCL2L11
hsa04114	hsa04114	Oocyte meiosis	115	0.33776857925077	1.72612963201438	0.000630104	0.00387063692945352	0.00239249895884214	2935	tags=34%, list=18%, signal=28%	CCNB1/MAD2L1/CDC20/CCNB2/CDK1/AURKA/PTTG1/ESPL1/BUB1/CDC25C/MAPK13/CCNE1/MAD1L1/PPP1CA/YWHAZ/PPP2R1A/ANAPC7/RPS6KA1/CCNE2/PLK1/ITPR3/ANAPC15/RBX1/ANAPC5/ADCY2/PKMYT1/SPDYE2/CALML4/PPP3CC/YWHAQ/PPP3CB/CALML5/SMC1B/YWHAB/ADCY7/FBXO43/PPP2CA/CALML3/CDC16
hsa00240	hsa00240	Pyrimidine metabolism	52	0.429928713107948	1.86403762065301	0.000693247	0.00418380791767238	0.00258607466147436	2335	tags=37%, list=15%, signal=31%	TYMS/RRM1/RRM2/TK1/DTYMK/DCTPP1/NME1/CAD/NUDT2/NT5M/ENTPD6/DUT/UPP1/TYMP/UPP2/CANT1/NT5C2/NT5C/HDDC2
hsa05219	hsa05219	Bladder cancer	41	0.468699247309301	1.93588393607351	0.000795883	0.00458711408471587	0.00283536427513038	4453	tags=63%, list=28%, signal=46%	MMP1/HRAS/CDKN2A/CCND1/CDK4/SRC/RASSF1/E2F3/CDKN1A/MDM2/TYMP/TP53/MMP9/E2F2/THBS1/MAP2K2/UPK3A/CXCL8/MYC/ERBB2/E2F1/RB1/MAPK3/HBEGF/DAPK1/NRAS
hsa04672	hsa04672	Intestinal immune network for IgA production	43	0.458677183798643	1.91183881152774	0.000808516	0.00458711408471587	0.00283536427513038	3186	tags=47%, list=20%, signal=37%	HLA-DQB2/CD80/HLA-DRA/HLA-DPA1/PIGR/HLA-DQB1/ICOS/ITGA4/HLA-DQA1/CXCR4/ITGB7/TGFB1/HLA-DOB/HLA-DMB/HLA-DPB1/HLA-DMA/TNFRSF17/HLA-DOA/CD86/TNFSF13B
hsa00260	hsa00260	Glycine, serine and threonine metabolism	37	-0.45248	-1.83554	0.000813413	0.00458711408471587	0.00283536427513038	4881	tags=62%, list=30%, signal=43%	PHGDH/PSAT1/DLD/AMT/CHDH/AGXT2/MAOA/DMGDH/PGAM2/GATM/CBS/AGXT/MAOB/GLYCTK/SARDH/ALDH7A1/CTH/PIPOX/DAO/GRHPR/BPGM/SHMT1/GNMT
hsa05165	hsa05165	Human papillomavirus infection	316	0.261289309523499	1.55232603749215	0.000776838	0.00458711408471587	0.00283536427513038	4472	tags=38%, list=28%, signal=28%	CCNA2/OASL/HRAS/CCNE1/HES4/CCND1/PPP2R1A/TUBG1/CCNE2/IRF3/BCAP31/ITGB3/CDK4/PPP2R2A/CASP8/HLA-F/LAMB3/ITGA6/ITGA2/HLA-A/COL4A1/CDKN1A/IKBKE/MDM2/ITGA3/ATP6V0B/PKM/TP53/PIK3R2/HLA-G/GNAS/HLA-B/ITGA4/BAX/ITGAV/CCND3/ATP6V1H/LAMA1/LAMA3/THBS1/ATP6V1B2/BAK1/COL4A2/TCF7/HLA-C/ITGB7/DVL3/TCIRG1/AXIN2/CDK6/CHD4/MAP2K2/CREB5/ITGB5/COL6A2/LAMA5/RELN/WNT5A/COMP/HES2/THBS2/ITGA5/DVL1/TYK2/TNC/PSMC1/HEYL/EIF…
hsa00380	hsa00380	Tryptophan metabolism	40	-0.453488	-1.88517	0.000846836	0.00469857609483225	0.00290426062165274	4557	tags=68%, list=28%, signal=48%	HAAO/DLD/ALDH8A1/TPH2/GCDH/ALDH3A2/AOX1/ACAT1/ECHS1/MAOA/CAT/KMO/ALDH1B1/ACAT2/DDC/HADH/TDO2/MAOB/EHHADH/ALDH2/ALDH7A1/ACMSD/CYP1A2/ALDH9A1/AADAT/CYP1A1/TPH1
hsa04380	hsa04380	Osteoclast differentiation	131	0.325384145082519	1.70564082988305	0.00102969	0.00562243171761609	0.00347530969081533	4071	tags=43%, list=25%, signal=32%	SQSTM1/MAPK13/RELB/TNFRSF11B/ITGB3/TREM2/ITPR3/LILRB1/IFNGR1/PIK3R2/FOSL2/LILRB4/FCGR3B/ATP2A3/ACP5/MAPK9/TGFB2/NFKB2/SIRPG/NCF1/TGFB1/PPP3CC/LILRB2/PPP3CB/GAB2/LCK/NCF2/TYK2/CYLD/BTK/FCGR2A/LCP2/SIRPB1/CSF1R/LILRB5/IKBKG/FYN/IL1A/IFNAR2/PIK3CD/TYROBP/IFNGR2/NCF4/GRB2/LILRA1/LILRA6/LILRA2/FCGR2B/LILRB3/FHL2/SYK/CYBA/PIK3R3/PLCG2/MAPK3/CAMK4
hsa04914	hsa04914	Progesterone-mediated oocyte maturation	89	0.358311292694717	1.75629146088788	0.00107252	0.00576478910648012	0.00356330293607401	1788	tags=28%, list=11%, signal=25%	CCNB1/MAD2L1/CCNB2/CCNA2/CDK1/AURKA/KIF22/CDC25B/CDC25A/BUB1/CDC25C/MAPK13/MAD1L1/ANAPC7/RPS6KA1/PLK1/ANAPC15/PIK3R2/GNAI2/ANAPC5/MAPK9/ADCY2/PKMYT1/HSP90AB1/SPDYE2
hsa00650	hsa00650	Butanoate metabolism	25	-0.518817	-1.8833	0.00109804	0.00581117168057311	0.00359197270341422	4595	tags=80%, list=29%, signal=57%	GAD1/HMGCS1/HMGCS2/GAD2/ALDH5A1/ACAT1/ECHS1/ACSM2B/HMGCL/L2HGDH/ACAT2/ABAT/HADH/BDH1/EHHADH/ACSM2A/ACSM5/ACSM3/ACADS/HMGCLL1
hsa05167	hsa05167	Kaposi sarcoma-associated herpesvirus infection	188	0.286389382672156	1.58848711385096	0.00115892	0.00604043929932114	0.00373368647020462	4532	tags=42%, list=28%, signal=30%	HRAS/MAPK13/CCND1/IRF3/CDK4/SRC/CASP8/HLA-F/GNB1/ITPR3/HLA-A/E2F3/MICB/CDKN1A/IKBKE/IFNGR1/TP53/PIK3R2/HLA-G/HLA-B/CCR5/GNG8/LEF1/BAX/E2F2/MAPK9/PIK3CG/BAK1/TCF7/HLA-C/GNG5/CDK6/LYN/CALML4/MAP2K2/PIK3R6/PPP3CC/PPP3CB/RPS27A/TYK2/CALML5/UBA52/CXCL8/PIK3R5/MYC/IKBKG/CALML3/PREX1/HIF1A/IFNAR2/PIK3CD/HLA-E/CD86/GNB4/HCK/PLCG1/CCR1/CXCL1/PTGS2/E2F1/CLEC2B/RB1/MAP1LC3B/SYK/TRADD/PIK3R3/MAPKAPK2/FADD/CC…
hsa01230	hsa01230	Biosynthesis of amino acids	67	0.391773330799216	1.80782710250798	0.00129657	0.0066570347040928	0.00411481337278686	1503	tags=24%, list=9%, signal=22%	TKT/PFKP/GAPDH/ALDOA/ENO1/TALDO1/TPI1/BCAT1/CS/ACO2/IDH3G/PSPH/PKM/ASNS/PYCR1/GLUL
hsa04810	hsa04810	Regulation of actin cytoskeleton	223	0.273289859189266	1.5499766631504	0.00141437	0.00715503883325725	0.00442263722251519	4142	tags=36%, list=26%, signal=27%	IQGAP3/HRAS/DIAPH3/CFL1/PFN1/ITGAX/PPP1CA/SSH1/FGF19/ACTB/MYH9/BDKRB2/PIP5K1C/MYL12B/MSN/ITGB3/SRC/SSH3/GNA13/ITGA6/ITGA2/BRK1/MYL12A/ITGA3/FGF1/ITGB2/PIK3R2/ITGA4/ITGAV/CXCR4/ARHGEF1/F2R/LPAR2/ARPC1B/ARPC5/ITGAE/ACTN1/ITGB7/ITGAL/MAP2K2/ITGB5/VAV1/ARPC4/PAK1/ITGA5/RAC2/WASF2/BDKRB1/MYL9/ARPC3/PIP4K2A/ARHGEF4/FGD3/SSH2/PDGFA/ITGA11/ITGB4/PIK3CD/SLC9A1/PPP1R12B/EZR/ITGA9/ITGAM/TMSB4X/NCKAP1L/GIT1/…
hsa00480	hsa00480	Glutathione metabolism	49	0.421203220288472	1.80651499288804	0.00154417	0.00763462832578818	0.00471907870810653	4278	tags=49%, list=27%, signal=36%	RRM1/RRM2/SRM/GSS/GSR/GPX4/PGD/G6PD/GSTK1/ODC1/GPX3/SMS/GPX7/GCLM/MGST3/GSTA3/GSTO2/TXNDC12/GSTO1/GSTP1/GPX2/GGT5/GGT6/GSTA4
hsa03250	hsa03250	Viral life cycle - HIV-1	58	0.392879945547962	1.76115843608008	0.00157575	0.00763462832578818	0.00471907870810653	4685	tags=53%, list=29%, signal=38%	PPIA/RAN/APOBEC3B/BICD1/NELFCD/CD4/MAP1S/ELL3/CCR5/APOBEC3F/CXCR4/MAP1A/HGS/PIN1/TNPO3/APOBEC3G/BICD2/APOBEC3C/NELFB/SMARCB1/MX1/MLLT3/FEZ1/VPS4A/MX2/MAP1B/KAT2A/SAMHD1/SUPT5H/CPSF6/CHMP6
hsa05162	hsa05162	Measles	129	0.319508336061597	1.66236192704119	0.00155934	0.00763462832578818	0.00471907870810653	5612	tags=54%, list=35%, signal=36%	CSNK2B/CCNE1/IL2RA/CCND1/CCNE2/IRF3/BCL2L1/MSN/CDK4/CASP8/HSPA6/CSNK2A1/IL2RB/IKBKE/IL2RG/TP53/APAF1/PIK3R2/IRAK1/EIF3H/CD3G/BAX/CCND3/OAS3/MAPK9/BAK1/OAS2/JAK3/CDK6/CBLB/TYK2/CD3D/TLR4/IKBKG/IL1A/CSNK2A2/IFNAR2/PIK3CD/IRAK4/MX1/TLR7/STAT5A/FCGR2B/TNFAIP3/CD209/MX2/TRADD/PIK3R3/SLAMF1/FADD/BCL2/FASLG/NFKBIB/EIF2AK4/IFNA1/MAVS/CD28/CD3E/CCND2/MAP3K7/TLR9/RELA/RAB9B/STAT1/IL6/CLEC4M/ADAR/EIF2S1/IFN…
hsa05022	hsa05022	Pathways of neurodegeneration - multiple diseases	422	0.236309762280352	1.44941294382234	0.00162273	0.00775303736742413	0.00479226911939925	3912	tags=31%, list=24%, signal=24%	UCHL1/CSNK2B/VCP/VDAC2/PSMD14/HRAS/MCU/OPTN/TOMM40L/NDUFS7/WDR41/KLC2/TUBA1C/SQSTM1/TUBA1B/MAPK13/SLC25A5/NDUFA7/UQCR10/VDAC3/STX1A/UQCRB/BCL2L1/PSMB2/PSMB3/COX4I1/COX8A/CASP8/PSMC4/CSNK2A1/PSMD8/PSMD2/NDUFA1/NDUFS3/CDK5/DNAH12/NDUFA9/ITPR3/GPX3/TRAP1/HIP1/TNFRSF1B/TUBB6/PSMD4/UBE2L3/APAF1/CSNK1E/UQCRC2/NDUFB1/NDUFB2/CACNA1S/CAPN2/COX6B1/PSMA4/BAX/ATP2A3/DCTN2/GPX7/MAPK9/SLC25A6/TUBB4B/NDUFB7/BAK…
hsa00860	hsa00860	Porphyrin metabolism	31	0.487525772493722	1.84586427595717	0.0016946	0.00798553388034557	0.00493597871428949	1194	tags=29%, list=7%, signal=27%	UROD/UROS/PPOX/FTH1/BLVRB/FTL/COX10/HMOX1/HMBS
hsa04659	hsa04659	Th17 cell differentiation	103	0.338661303700631	1.69782548731833	0.00202402	0.0094089563962255	0.0058158176010941	3448	tags=41%, list=22%, signal=32%	MAPK13/IL2RA/CD247/HLA-DQB2/HLA-DRA/HLA-DPA1/HLA-DQB1/IL2RB/IL2RG/ZAP70/CD4/IFNGR1/CD3G/HLA-DQA1/TBX21/MAPK9/HSP90AB1/JAK3/TGFB1/PPP3CC/HLA-DOB/IL12RB1/HLA-DMB/HLA-DPB1/PPP3CB/LCK/TYK2/HLA-DMA/NFKBIE/CD3D/IL27RA/HLA-DOA/IKBKG/LAT/HIF1A/IRF4/PLCG1/IFNGR2/PRKCQ/GATA3/IL21R/STAT5A
hsa05014	hsa05014	Amyotrophic lateral sclerosis	315	0.251840384402127	1.49583104668269	0.00206457	0.00946948538839693	0.00585323148242405	3912	tags=32%, list=24%, signal=25%	NDC1/VCP/PSMD14/MCU/OPTN/MATR3/NUP93/TOMM40L/NDUFS7/WDR41/KLC2/TUBA1C/SQSTM1/TUBA1B/NUP210/MAPK13/NDUFA7/NUP188/PFN1/UQCR10/UQCRB/ACTB/BCL2L1/PSMB2/PSMB3/ALYREF/COX4I1/COX8A/PSMC4/PSMD8/PSMD2/NDUFA1/NDUFS3/DNAH12/NUP43/NDUFA9/ITPR3/GPX3/TNFRSF1B/TUBB6/PSMD4/TP53/APAF1/UQCRC2/NDUFB1/NDUFB2/NUP205/COX6B1/PSMA4/BAX/DCTN2/GPX7/UBQLN4/TUBB4B/NDUFB7/NXT1/NDUFA13/PSMB4/TUBB3/COX4I2/PPP3CC/COX6A1/DAXX/PP…
hsa03040	hsa03040	Spliceosome	117	0.326451798018919	1.66832015102906	0.00221308	0.0100010449953661	0.00618179647816386	3181	tags=32%, list=20%, signal=26%	SF3B3/PPIH/SNRPB/SNRPA/SNRPD1/PRPF4/SNRPC/SF3B5/SNRPD3/EFTUD2/RBM8A/LSM4/EIF4A3/ALYREF/PRPF6/SNRNP200/HSPA6/SNRPE/SNRPD2/LSM7/SF3B2/ACIN1/SNRPA1/PPIE/SF3B4/TXNL4A/LSM2/RBM25/U2AF2/HNRNPC/SF3A1/FUS/PRPF38B/LSM5/SNRNP40/SNRPF/PRPF31
hsa05206	hsa05206	MicroRNAs in cancer	156	0.298606551755877	1.6029337384527	0.00223861	0.0100010449953661	0.00618179647816386	4536	tags=46%, list=28%, signal=33%	KIF23/CDCA5/STMN1/EZH2/CDC25B/HRAS/CDC25A/SLC7A1/CDC25C/CDKN2A/CCNE1/ST14/TRIM71/CCND1/CCNE2/TPM1/ITGB3/RASSF1/HMOX1/E2F3/CDKN1A/MDM2/MAPK7/TP53/DNMT1/PIK3R2/DNMT3A/MMP9/E2F2/THBS1/TGFB2/BAK1/CDK6/MAP2K2/VIM/ITGA5/TNC/CD44/ATM/MARCKS/MYC/PDGFA/ERBB2/PRKCB/SOX4/PIK3CD/BMF/ABL1/GLS/PLCG1/GRB2/ABCC1/EZR/PTGS2/E2F1/DICER1/ABCB1/HDAC2/PIK3R3/BCL2/PLCG2/MCL1/MAPK3/PDGFRB/EFNA5/HNRNPK/NRAS/FOXP1/RHOA/BC…
hsa05321	hsa05321	Inflammatory bowel disease	61	0.382054008640896	1.7416666699584	0.00229079	0.0101029689605033	0.00624479721548857	3394	tags=41%, list=21%, signal=32%	HLA-DQB2/HLA-DRA/HLA-DPA1/TGFB3/HLA-DQB1/IL2RG/IFNGR1/IL18/HLA-DQA1/TBX21/TGFB2/TGFB1/IL18RAP/HLA-DOB/IL12RB1/HLA-DMB/HLA-DPB1/STAT4/HLA-DMA/TLR4/HLA-DOA/IL1A/IFNGR2/GATA3/IL21R
hsa00830	hsa00830	Retinol metabolism	48	-0.396503	-1.72948	0.00234024	0.0101903974216028	0.00629883806353664	4612	tags=58%, list=29%, signal=42%	UGT2B17/PNPLA4/CYP2B6/UGT2B15/CYP2C18/CYP2C9/UGT2B4/ALDH1A2/AOX1/ADH1A/CYP2C8/RDH10/CYP3A4/RETSAT/HSD17B6/ADH4/ADH6/RDH16/ADH1B/RPE65/CYP1A2/DHRS3/ADH1C/CYP1A1/CYP27C1/CYP26A1/RDH11/ALDH1A3
hsa00190	hsa00190	Oxidative phosphorylation	99	0.327160939535283	1.63208960308357	0.00270235	0.0116201260924232	0.0071825748796496	2807	tags=31%, list=18%, signal=26%	NDUFS7/NDUFA7/UQCR10/UQCRB/COX4I1/COX8A/COX10/NDUFA1/NDUFS3/NDUFA9/ATP6V0B/UQCRC2/NDUFB1/NDUFB2/COX6B1/ATP4B/ATP6V1H/NDUFB7/ATP6V1B2/NDUFA13/COX4I2/TCIRG1/COX6A1/NDUFA3/NDUFB11/ATP6V0C/ATP6V1E1/COX5B/NDUFC1/UQCRFS1/UQCR11
hsa05010	hsa05010	Alzheimer disease	336	0.239776093868605	1.4364111390747	0.00277081	0.0117673805740111	0.00727359509164701	3614	tags=29%, list=23%, signal=23%	CSNK2B/GAPDH/VDAC2/PSMD14/HRAS/MCU/NDUFS7/KLC2/TUBA1C/TUBA1B/SLC25A5/NDUFA7/UQCR10/VDAC3/UQCRB/PSMB2/PSMB3/COX4I1/COX8A/CASP8/PSMC4/CSNK2A1/PSMD8/PSMD2/NDUFA1/NDUFS3/CDK5/NDUFA9/ITPR3/TUBB6/PSMD4/APAF1/CSNK1E/UQCRC2/PIK3R2/NDUFB1/NDUFB2/CACNA1S/CAPN2/COX6B1/SLC39A10/PSMA4/ATP2A3/MAPK9/SLC25A6/TUBB4B/NDUFB7/NDUFA13/PSMB4/TUBB3/DVL3/COX4I2/AXIN2/CALML4/MAP2K2/PPP3CC/COX6A1/DKK4/DKK1/PPP3CB/WNT5A/ND…
hsa04666	hsa04666	Fc gamma R-mediated phagocytosis	89	0.339979724594025	1.66643781358082	0.002954	0.01239238719926	0.00765992109623783	4103	tags=49%, list=26%, signal=37%	CFL1/PLA2G4C/PIP5K1C/PIK3R2/FCGR3B/ARPC1B/WAS/ARPC5/NCF1/LYN/VAV1/PTPRC/GAB2/ARPC4/PAK1/RAC2/WASF2/ASAP1/MARCKS/VASP/SPHK1/FCGR2A/ARPC3/INPP5D/PRKCB/LAT/PIK3CD/HCK/PLCG1/PRKCD/RPS6KB2/DNM2/FCGR2B/ARPC2/ACTR3/SYK/LIMK1/PIK3R3/BIN1/INPPL1/PLCG2/MAPK3/MARCKSL1/MYO10
hsa04062	hsa04062	Chemokine signaling pathway	182	0.282611422560083	1.55997559469248	0.00302593	0.0125412010807211	0.00775190519677376	4718	tags=45%, list=29%, signal=32%	HRAS/CCL20/CCL5/CXCL9/CXCL11/CCL13/CXCL5/SRC/CXCR6/PPBP/GNB1/CCL21/CXCL16/CX3CL1/PF4/PIK3R2/CCR5/GNAI2/CXCL10/GNG8/ARRB2/CXCR4/PIK3CG/WAS/ADCY2/GNG5/PTK2B/JAK3/NCF1/LYN/PIK3R6/FGR/VAV1/CCR7/ITK/PAK1/RAC2/DOCK2/GRK6/CXCL6/CCL18/CCR2/ADCY7/CXCL8/PIK3R5/IKBKG/PRKCB/PREX1/PIK3CD/CCL24/GNB4/HCK/PLCG1/PRKCD/GRB2/CCR1/CCL23/CXCL1/PLCB2/CCL19/CXCR3/PF4V1/PLCB3/PIK3R3/CCR8/PLCG2/MAPK3/ADCY4/RASGRP2/NFKBIB…
hsa04820	hsa04820	Cytoskeleton in muscle cells	226	0.260631484301755	1.47757012081085	0.00334265	0.0136889650504524	0.00846135538614257	3190	tags=30%, list=20%, signal=24%	LMNB1/DIAPH3/ENO1/DTNA/NEB/TPM3/TPM1/ACTB/PDLIM1/MYH9/ITGB3/ZYX/ITGA6/CAPZA1/ITGA2/SPTAN1/LMNB2/COL4A1/ITGA3/CSRP1/ITGA4/FMNL2/ITGAV/LAMA1/THBS1/COL4A2/LMNA/ITGB7/TLN1/INF2/CAPZB/ITGB5/COL6A2/FMNL3/TPM4/FMNL1/AGRN/VIM/COMP/THBS2/TMOD3/ITGA5/SDC3/VCAN/SGCB/MYH13/LBR/MYL4/MYL9/TNNI2/COL6A1/ACTG2/PDLIM3/FLNC/MYPN/TMEM43/ANKRD1/COL1A1/ITGA11/COL5A1/COL1A2/ITGB4/FBN3/ELN/AMPD2/LMOD1/BGN/ATP1B3
hsa04621	hsa04621	NOD-like receptor signaling pathway	170	0.277461815737719	1.51192185515876	0.00358704	0.0145169508672497	0.00897314588489728	5107	tags=46%, list=32%, signal=32%	VDAC2/TRIP6/MCU/TXN/MAPK13/CCL5/VDAC3/IRF3/BCL2L1/CASP8/RIPK2/ITPR3/DEFA4/IKBKE/IL18/GBP5/TRPV2/OAS3/MAPK9/OAS2/HSP90AB1/CTSB/CASP5/NAIP/PSTPIP1/AIM2/GBP4/TYK2/CASP1/PKN1/RIPK3/NLRX1/TLR4/NLRC4/CXCL8/IKBKG/IFNAR2/TRAF5/PYDC1/IRAK4/CYBB/PRKCD/NLRP1/NLRP3/CXCL1/GBP2/PYCARD/TXNIP/PLCB2/TNFAIP3/CARD16/IFI16/MAP1LC3B/CYBA/PLCB3/FADD/BCL2/MAPK3/NOD1/CAMP/NFKBIB/RHOA/MAP1LC3C/CXCL3/MAP1LC3A/RBCK1/DNM1L/…
hsa03460	hsa03460	Fanconi anemia pathway	45	0.399524875509961	1.67803643293065	0.0046211	0.0184843857063627	0.0114254770890002	2113	tags=38%, list=13%, signal=33%	RMI2/UBE2T/FANCD2/FANCG/FANCI/RAD51/BRIP1/FANCA/BRCA2/TOP3B/POLH/BLM/EME2/SLX4/RPA1/POLN/MUS81
hsa04710	hsa04710	Circadian rhythm	30	-0.454154	-1.743	0.00478833	0.0189331791528707	0.0117028830749078	2628	tags=60%, list=16%, signal=50%	CUL1/BHLHE40/RORC/PRKAG2/CRY2/PRKAB2/FBXW11/DBP/PRKAA1/RORB/NR1D2/CRY1/RORA/BTRC/PER2/CLOCK/PER3/FBXL3
hsa00511	hsa00511	Other glycan degradation	15	0.571288659899045	1.76345140527027	0.00545033	0.0206034558753626	0.012735306263229	4437	tags=73%, list=28%, signal=53%	FUCA2/HEXA/NEU1/HEXB/GBA2/MAN2B1/FUCA1/MAN2C1/MANBA/MAN2B2/ENGASE
hsa00071	hsa00071	Fatty acid degradation	42	-0.396959	-1.67316	0.00539559	0.0206034558753626	0.012735306263229	5557	tags=69%, list=35%, signal=45%	ACAA2/ADH5/ACADM/ECI1/CPT2/ACSBG1/GCDH/ALDH3A2/ECI2/ACAT1/ECHS1/ADH1A/ACADL/ACSL1/ALDH1B1/ADH4/ACAT2/HADH/EHHADH/ACOX1/ALDH2/ALDH7A1/ADH6/ADH1B/ACADSB/ACADS/ALDH9A1/ADH1C/CYP2U1
hsa05142	hsa05142	Chagas disease	99	0.311094256758364	1.55193863532593	0.0054314	0.0206034558753626	0.012735306263229	4141	tags=40%, list=26%, signal=30%	MAPK13/CCL5/GNAL/CD247/PPP2R1A/TGFB3/BDKRB2/PPP2R2A/CASP8/ACE/IFNGR1/C1QC/PIK3R2/GNAS/IRAK1/GNAI2/CD3G/MAPK9/TGFB2/TGFB1/CD3D/TLR4/CFLAR/CXCL8/TLR6/C1QA/C1QB/PPP2CA/GNA15/IKBKG/PIK3CD/IRAK4/IFNGR2/PLCB2/PLCB3/PIK3R3/SERPINE1/FADD/MAPK3/FASLG
hsa05163	hsa05163	Human cytomegalovirus infection	214	0.261787868544918	1.47869436227588	0.00540465	0.0206034558753626	0.012735306263229	4141	tags=36%, list=26%, signal=27%	HRAS/MAPK13/CDKN2A/CCL5/TAP1/CCND1/IRF3/ITGB3/CDK4/SRC/CASP8/HLA-F/TAPBP/GNA13/GNB1/ITPR3/HLA-A/E2F3/CDKN1A/MDM2/CX3CL1/TP53/PIK3R2/HLA-G/GNAS/HLA-B/CCR5/GNAI2/GNG8/BAX/ITGAV/CXCR4/ARHGEF1/E2F2/PTGER2/BAK1/ADCY2/HLA-C/GNG5/PTK2B/CDK6/CALML4/MAP2K2/PPP3CC/CREB5/PPP3CB/RAC2/CALML5/EIF4EBP1/ADCY7/CXCL8/AKAP13/MYC/IKBKG/CALML3/PRKCB/PIK3CD/HLA-E/IL10RA/TRAF5/TAP2/GNB4/GRB2/CCR1/IL10RB/RPS6KB2/PLCB2/P…
hsa04670	hsa04670	Leukocyte transendothelial migration	107	0.304915514618865	1.52825489833615	0.00617252	0.0230798544889312	0.0142660055286539	4534	tags=47%, list=28%, signal=34%	MAPK13/CLDN4/CLDN7/CLDN2/ACTB/MYL12B/MSN/MYL12A/ITGB2/PIK3R2/GNAI2/ITGA4/MMP9/CXCR4/CD99/ACTN1/PTK2B/ITGAL/NCF1/CTNNA1/VAV1/ITK/NCF2/RAC2/MYL9/VASP/CLDN3/CLDN15/THY1/PRKCB/PIK3CD/CYBB/PLCG1/NCF4/RASSF5/EZR/ITGAM/PECAM1/MYL5/CDH5/CYBA/PIK3R3/PLCG2/VCL/CLDN10/ICAM1/ITGB1/SIPA1/RHOA/GNAI3
hsa00760	hsa00760	Nicotinate and nicotinamide metabolism	36	-0.415221	-1.68509	0.00635491	0.0232562514166877	0.01437503912537	3905	tags=53%, list=24%, signal=40%	AOX1/NMRK2/NT5E/ENPP3/NAMPT/NAPRT/NMNAT3/NADK2/SIRT2/QPRT/NNMT/ENPP1/NUDT12/SIRT5/NUDT13/SIRT4/NNT/NADK/SIRT1
hsa04742	hsa04742	Taste transduction	74	-0.324359	-1.59587	0.00630819	0.0232562514166877	0.01437503912537	6138	tags=62%, list=38%, signal=39%	P2RX2/GABRA2/HTR1D/TAS2R7/GABRA5/SCN3A/TAS2R4/GABRA1/GABRA6/CALHM1/ENTPD2/SCNN1G/P2RY4/HTR1B/TAS2R40/TAS2R19/HTR3A/ADCY6/PLCB4/HTR3C/TAS2R41/PRKACA/PRKACG/SCN2A/TAS2R16/TAS2R39/TAS2R38/HTR3B/HCN4/TAS2R5/SCN9A/TAS1R2/HTR1E/SCNN1A/ASIC2/GABRA3/PLCB1/TAS2R10/TAS2R9/GABRA4/GNAT3/TAS2R3/TAS2R45/TAS2R13/KCNK5/TAS2R14
hsa04510	hsa04510	Focal adhesion	195	0.265790328934582	1.48051	0.00691197	0.0250285933380241	0.0154705503496967	4094	tags=36%, list=26%, signal=27%	HRAS/CCND1/PPP1CA/PARVB/ACTB/PIP5K1C/MYL12B/ITGB3/SRC/ZYX/LAMB3/ITGA6/ITGA2/MYL12A/COL4A1/ITGA3/PIK3R2/CAPN2/ITGA4/ITGAV/CCND3/LAMA1/LAMA3/THBS1/MAPK9/COL4A2/ILK/ACTN1/ITGB7/TLN1/ITGB5/COL6A2/FLNA/VAV1/LAMA5/RELN/COMP/THBS2/PAK1/ITGA5/RAC2/TNC/MYL9/COL6A1/SPP1/VASP/PGF/PDGFA/COL1A1/ITGA11/ERBB2/FYN/PRKCB/PARVG/COL1A2/ITGB4/PIK3CD/FLNB/LAMC2/GRB2/PPP1R12B/ITGA9/MYL5/LAMB1/PIK3R3/BCL2/MAPK3/COL2A1/…
hsa04935	hsa04935	Growth hormone synthesis, secretion and action	119	-0.279091	-1.51683	0.00727317	0.0260622028724823	0.0161094399640191	3174	tags=30%, list=20%, signal=24%	GHRHR/PTK2/GHR/IRS2/IRS1/SOS2/SHC3/SHC4/AKT1/CRK/CREBBP/STAT3/GSK3B/STAT5B/PLCB1/IGFALS/SSTR2/MAPK8/ITPR1/ATF2/SOCS2/KRAS/MAPK1/CRKL/CREB3L4/POU1F1/MAPK14/SSTR1/MAP2K1/SHC2/ADCY9/GNAQ/ADCY1/PIK3R1/GNAI1/IGF1
hsa03013	hsa03013	Nucleocytoplasmic transport	96	0.310731346128479	1.5373999081201	0.0075863	0.0266294764858271	0.0164600803247768	1841	tags=25%, list=11%, signal=22%	KPNA2/NDC1/NUP93/DDX19A/XPO6/NUP210/NUP188/RAN/IPO5/RBM8A/EIF4A3/ALYREF/IPO4/RNPS1/THOC5/NUP43/ACIN1/KPNB1/NUP205/TNPO2/XPO7/NXT1/TNPO3/EEF1A2
hsa05135	hsa05135	Yersinia infection	132	0.285691997356007	1.49694437754974	0.00755605	0.0266294764858271	0.0164600803247768	3853	tags=39%, list=24%, signal=30%	MAPK13/RPS6KA1/ACTB/IRF3/PIP5K1C/SRC/CD8A/ZAP70/CD4/IL18/PIK3R2/IRAK1/ITGA4/ARHGEF1/MAPK9/ARPC1B/WAS/ARPC5/PTK2B/MAP2K2/RHOG/VAV1/LCK/ARPC4/ITGA5/RAC2/CASP1/WASF2/PKN1/TLR4/FCGR2A/ARPC3/NLRC4/CXCL8/LCP2/IKBKG/LAT/PIK3CD/WIPF2/IRAK4/PLCG1/GIT2/ARHGEF28/WIPF1/NLRP3/ELMO2/PYCARD/ARPC2/ACTR3/LIMK1/PIK3R3
hsa04550	hsa04550	Signaling pathways regulating pluripotency of stem cells	134	-0.266641	-1.48887	0.00770439	0.0267708210742625	0.0165474475428428	2616	tags=24%, list=16%, signal=20%	IL6ST/ACVR1/AKT1/BMPR2/FZD6/INHBC/STAT3/GSK3B/ID2/PCGF1/MYF5/SMARCAD1/MEIS1/ESX1/KRAS/MAPK1/APC/MAPK14/FZD4/PCGF6/ACVR1C/MAP2K1/SMAD1/PCGF5/WNT7B/KAT6A/PIK3R1/IGF1/INHBA/ACVR2A/SMAD4/ACVR2B
hsa04611	hsa04611	Platelet activation	118	0.297260516638078	1.52385156978107	0.00830593	0.0285724090982294	0.0176610362235078	4690	tags=48%, list=29%, signal=34%	MAPK13/PPP1CA/PLA2G4C/ACTB/MYL12B/ITGB3/SRC/GNA13/ITPR3/ITGA2/MYL12A/P2RY12/PIK3R2/GNAS/GNAI2/ARHGEF1/F2R/PIK3CG/TBXAS1/ADCY2/TLN1/LYN/PIK3R6/PTGIR/FERMT3/BTK/VASP/FCGR2A/FCER1G/ADCY7/PIK3R5/LCP2/COL1A1/FYN/COL1A2/PIK3CD/RASGRP1/P2RX1/PLCB2/P2RY1/SYK/PLCB3/PIK3R3/GUCY1A2/PLCG2/MAPK3/ADCY4/RASGRP2/ITGB1/PTGS1/ITGA2B/COL3A1/RHOA/GNAI3/VAMP8/TBXA2R/NOS3
hsa01200	hsa01200	Carbon metabolism	109	0.300355017226916	1.50702404226866	0.00864465	0.0294431643505735	0.0181992631542712	1176	tags=19%, list=7%, signal=18%	HKDC1/TKT/PFKP/GAPDH/ALDOA/ME1/ENO1/TALDO1/TPI1/PDHA1/PGP/CS/ACO2/PGD/G6PD/OGDH/IDH3G/PSPH/GPI/ME3/PKM
hsa03020	hsa03020	RNA polymerase	29	0.432143096205286	1.61177889679261	0.0106618	0.0359573219072241	0.0222257620111973	3500	tags=41%, list=22%, signal=32%	POLR2G/POLR2L/POLR2E/POLR1E/POLR3D/POLR3C/POLR1D/POLR1A/POLR3A/POLR3K/POLR1B/POLR2J
hsa04064	hsa04064	NF-kappa B signaling pathway	99	0.298450469268246	1.48886327512085	0.0107888	0.0360323765203426	0.022272154397519	5107	tags=51%, list=32%, signal=35%	CSNK2B/CCL13/BCL2L1/RELB/CSNK2A1/CCL21/ZAP70/TRAF1/IRAK1/NFKB2/LYN/CARD11/LCK/CYLD/LTB/BTK/ATM/TLR4/BCL2A1/CFLAR/CXCL8/IKBKG/PRKCB/CSNK2A2/LAT/TRAF5/IRAK4/PLCG1/TNFSF13B/PRKCQ/CXCL1/LY96/PTGS2/TNFAIP3/SYK/CCL19/TRADD/BCL2/PLCG2/CARD14/ICAM1/PIDD1/ERC1/CXCL3/TNFSF11/PLAU/MAP3K7/CCL4/VCAM1/RELA
hsa05410	hsa05410	Hypertrophic cardiomyopathy	97	0.310229170860927	1.5410010223937	0.0111264	0.0364521127959227	0.0225315997086181	2481	tags=27%, list=15%, signal=23%	DTNA/TPM3/TGFB3/TPM1/ACTB/CACNG7/ITGB3/ACE/ITGA6/ITGA2/ITGA3/CACNA1S/ITGA4/ATP2A3/ITGAV/LAMA1/TGFB2/LMNA/ITGB7/TGFB1/ITGB5/TPM4/ITGA5/SGCB/PRKAB1/PRKAA2
hsa05414	hsa05414	Dilated cardiomyopathy	102	0.300976377156395	1.50960206528433	0.011107	0.0364521127959227	0.0225315997086181	2287	tags=25%, list=14%, signal=21%	DTNA/TPM3/TGFB3/TPM1/ACTB/CACNG7/ITGB3/ITGA6/ITGA2/ITGA3/GNAS/CACNA1S/ITGA4/ATP2A3/ITGAV/LAMA1/TGFB2/ADCY2/LMNA/ITGB7/TGFB1/ITGB5/TPM4/ITGA5/SGCB
hsa03082	hsa03082	ATP-dependent chromatin remodeling	85	0.314412521184383	1.53334	0.0129371	0.0419844559295878	0.0259512242894025	4652	tags=45%, list=29%, signal=32%	RUVBL2/SMARCC1/SMARCA4/ACTB/INO80C/RUVBL1/MCRS1/MEAF6/GATAD2A/MRGBP/BRD7/MBD3/ACTL6B/BCL7C/MBD2/TRRAP/CHD4/SMARCE1/RBBP7/EP400/BPTF/SMARCB1/BAZ2A/SMARCD1/SMARCD3/TFPT/CHD3/KAT5/INO80E/BAZ1A/HDAC2/MTA1/RBBP4/BCL7B/SMARCD2/ARID1B/VPS72/CHRAC1
hsa04150	hsa04150	mTOR signaling pathway	148	-0.25081	-1.42641	0.0147953	0.0475662939181314	0.0294014423851363	3074	tags=28%, list=19%, signal=23%	SESN2/LPIN3/LAMTOR5/INSR/IRS1/SOS2/STRADB/AKT1/RHEB/FZD6/RNF152/ATP6V1A/ULK1/GSK3B/LAMTOR3/CAB39/GRB10/RRAGD/RICTOR/WDR59/FNIP1/KRAS/CHUK/PRKAA1/SGK1/MAPK1/ATP6V1C2/STK11/SLC38A9/ATP6V1B1/RPS6KB1/FZD4/MAP2K1/TNF/WNT7B/FNIP2/PIK3R1/PTEN/IGF1/LPIN1/DEPTOR
hsa03430	hsa03430	Mismatch repair	22	0.467161358031359	1.62636032128992	0.0162501	0.0515006011473565	0.0318332969148287	1683	tags=32%, list=11%, signal=29%	LIG1/PCNA/RFC4/POLD1/RFC3/RFC2/RPA1
hsa00052	hsa00052	Galactose metabolism	28	0.422381050565021	1.5640171948515	0.0163185	0.0515006011473565	0.0318332969148287	4835	tags=61%, list=30%, signal=42%	HKDC1/PFKP/GLA/AKR1B10/G6PC3/AKR1B1/HK2/HK3/GALT/PFKM/HK1/GAA/GALE/GANC/LALBA/PFKL/B4GALT2
hsa04216	hsa04216	Ferroptosis	40	0.385795834272442	1.57746124453428	0.0174055	0.0539414867904846	0.0333420450785737	2438	tags=38%, list=15%, signal=32%	SLC7A11/VDAC2/GSS/GPX4/ACSL4/VDAC3/FTH1/FTL/HMOX1/SLC3A2/TP53/ATG7/GCLM/SLC40A1/SAT1
hsa04623	hsa04623	Cytosolic DNA-sensing pathway	73	0.328709080814444	1.54750746142094	0.0173044	0.0539414867904846	0.0333420450785737	5773	tags=53%, list=36%, signal=34%	CCL5/DDX41/POLR2L/POLR2E/IRF3/CASP8/IKBKE/IL18/DNASE2B/CXCL10/ZBP1/POLR3D/DNASE2/POLR3C/POLR1D/AIM2/CASP1/RIPK3/POLR3A/IKBKG/POLR3K/MLKL/NLRP3/PYCARD/IFI16/FADD/NFKBIB/SAMHD1/IFNA1/MAVS/CCL4/RELA/IL6/POLR3E/ADAR/IFNA17/IFNA7/G3BP1/IFNA4
hsa04217	hsa04217	Necroptosis	123	0.279906576789324	1.44299144740326	0.0178963	0.0549671429980354	0.0339760186217967	3912	tags=37%, list=24%, signal=28%	VDAC2/PPIA/SQSTM1/SLC25A5/TNFRSF10A/VDAC3/FTH1/FTL/PLA2G4C/CASP8/HMGB1/IFNGR1/PYGB/CAPN2/BAX/ZBP1/GLUL/CHMP1A/MAPK9/SLC25A6/HSP90AB1/JAK3/TYK2/STAT4/CASP1/CHMP2A/CYLD/RIPK3/TLR4/SPATA2L/CFLAR/IL1A/IFNAR2/MLKL/TRAF5/CYBB/IFNGR2/NLRP3/STAT5A/PYCARD/TNFAIP3/VPS4A/TRADD/FADD/BCL2
hsa05144	hsa05144	Malaria	46	0.363892778881796	1.53920920565357	0.0188345	0.0573370118736141	0.0354408702523563	3558	tags=39%, list=22%, signal=31%	TGFB3/ACKR1/ITGB2/IL18/THBS1/TGFB2/ITGAL/TGFB1/COMP/THBS2/TLR4/CR1/CXCL8/SELP/GYPC/KLRB1/PECAM1/CD36
hsa00770	hsa00770	Pantothenate and CoA biosynthesis	21	-0.469172	-1.64351	0.0195511	0.0589962705329842	0.0364664830099841	4654	tags=71%, list=29%, signal=51%	COASY/DPYS/CSAD/ALDH3A2/GADL1/PPCS/ENPP3/UPB1/ALDH1B1/AASDHPPT/PANK1/ALDH2/ENPP1/PANK3/DPYD
hsa04714	hsa04714	Thermogenesis	193	0.244035867984019	1.35838953744611	0.0214581	0.0641876732289996	0.0396753671733719	4536	tags=36%, list=28%, signal=26%	HRAS/NDUFS7/MAPK13/NDUFA7/SMARCC1/SMARCA4/UQCR10/ACSL4/KDM1A/UQCRB/RPS6KA1/NDUFAF2/ACTB/COX4I1/COX8A/COX10/CPT1A/NDUFA1/NDUFS3/NDUFA9/RPS6/NDUFAF3/UQCRC2/NDUFB1/GNAS/NDUFB2/COX6B1/NDUFB7/ADCY2/NDUFA13/ACTL6B/COX4I2/COX6A1/CREB5/SMARCE1/NDUFA3/PRKAB1/NDUFB11/PRKAA2/ADCY7/COX5B/NDUFC1/UQCRFS1/UQCR11/SMARCB1/COA3/SMARCD1/NDUFV1/GRB2/SMARCD3/NDUFB8/RPS6KB2/COX7B/NDUFB10/AKT1S1/PRKAG1/COX19/SIRT6/TSC2…
hsa05310	hsa05310	Asthma	26	0.444839682757813	1.62108613790865	0.0218778	0.0648789394534271	0.0401026492337585	3001	tags=46%, list=19%, signal=38%	HLA-DQB2/HLA-DRA/HLA-DPA1/HLA-DQB1/HLA-DQA1/HLA-DOB/HLA-DMB/HLA-DPB1/HLA-DMA/FCER1G/HLA-DOA/RNASE3
hsa05220	hsa05220	Chronic myeloid leukemia	75	0.31392855896843	1.4860080777768	0.0223315	0.0656584456373111	0.0405844737415448	4012	tags=44%, list=25%, signal=33%	HRAS/CDKN2A/CCND1/DDB2/TGFB3/BCL2L1/CDK4/E2F3/CDKN1A/MDM2/CBL/TP53/PIK3R2/BAX/E2F2/TGFB2/BAK1/CDK6/TGFB1/MAP2K2/GAB2/MYC/IKBKG/PIK3CD/ABL1/GRB2/STAT5A/E2F1/BCR/RB1/HDAC2/PIK3R3/MAPK3
hsa05208	hsa05208	Chemical carcinogenesis - reactive oxygen species	186	0.256260990680242	1.42201538406409	0.0228768	0.0666917511695864	0.0412231754475412	3347	tags=30%, list=21%, signal=24%	NQO1/VDAC2/HRAS/NDUFS7/MAPK13/SLC25A5/NDUFA7/UQCR10/VDAC3/UQCRB/COX4I1/COX8A/SRC/NDUFA1/NDUFS3/NDUFA9/HMOX1/CBR1/UQCRC2/PIK3R2/AKR1C1/NDUFB1/NDUFB2/COX6B1/MAPK9/SLC25A6/NDUFB7/NDUFA13/SLC26A2/COX4I2/PRKD2/MGST3/NCF1/MAP2K2/COX6A1/NDUFA3/NCF2/GSTA3/GSTO2/NDUFB11/AKR1C3/PTPN1/COX5B/NDUFC1/UQCRFS1/UQCR11/IKBKG/NOX4/HIF1A/PIK3CD/ABL1/NDUFV1/PRKCD/GSTO1/GRB2/NDUFB8
hsa05212	hsa05212	Pancreatic cancer	76	0.310470729878726	1.47008886074692	0.0235291	0.0680170267750036	0.0420423482513792	4142	tags=42%, list=26%, signal=31%	RAD51/CDKN2A/CCND1/DDB2/TGFB3/BCL2L1/CDK4/BRCA2/RALA/E2F3/CDKN1A/TP53/PIK3R2/BAX/TGFA/E2F2/MAPK9/TGFB2/BAK1/CDK6/TGFB1/RAC2/IKBKG/ERBB2/PIK3CD/RPS6KB2/E2F1/RALBP1/RB1/PIK3R3/MAPK3/ARHGEF6
hsa05225	hsa05225	Hepatocellular carcinoma	155	0.262998614689274	1.40647665838605	0.0240126	0.0688360454410907	0.0425485960192788	3476	tags=32%, list=22%, signal=26%	NQO1/HRAS/CDKN2A/TXNRD1/SMARCC1/SMARCA4/CCND1/DDB2/TGFB3/ACTB/BCL2L1/CDK4/HMOX1/E2F3/CDKN1A/TP53/PIK3R2/LEF1/BAX/TGFA/BRD7/E2F2/TGFB2/BAK1/TCF7/DVL3/ACTL6B/MGST3/AXIN2/CDK6/TGFB1/MAP2K2/SMARCE1/WNT5A/DVL1/GSTA3/GSTO2/MYC/PRKCB/PIK3CD/SMARCB1/SMARCD1/PLCG1/GSTO1/AXIN1/GRB2/SMARCD3/GSTP1/RPS6KB2/FZD2
hsa00053	hsa00053	Ascorbate and aldarate metabolism	18	-0.466247	-1.55899	0.0252738	0.0718529067597424	0.0444133634194246	4612	tags=56%, list=29%, signal=40%	UGT2B17/UGT2B15/RGN/ALDH3A2/UGT2B4/ALDH1B1/ALDH2/ALDH7A1/ALDH9A1/KL
hsa04260	hsa04260	Cardiac muscle contraction	80	0.303498910016899	1.46228681067613	0.0264244	0.0745082777727624	0.0460546882193942	5040	tags=39%, list=31%, signal=27%	UQCR10/TPM3/UQCRB/TPM1/CACNG7/COX4I1/COX8A/ASPH/UQCRC2/CACNA1S/COX6B1/ATP2A3/COX4I2/COX6A1/TPM4/MYL4/COX5B/UQCRFS1/UQCR11/SLC9A1/ATP1B3/COX7B/SLC8A1/UQCRQ/FXYD2/CACNB3/TPM2/CACNA2D4/COX7A2/CYC1/UQCRC1
hsa00900	hsa00900	Terpenoid backbone biosynthesis	21	-0.444648	-1.5576	0.0280514	0.0784526445879718	0.0484927607306313	4595	tags=76%, list=29%, signal=54%	MVK/PMVK/HMGCS1/HMGCS2/FDPS/ACAT1/PDSS2/ACAT2/FNTA/ZMPSTE24/MVD/IDI2/IDI1/NUS1/HMGCR/PCYOX1
hsa00620	hsa00620	Pyruvate metabolism	46	-0.333301	-1.43576	0.0286014	0.0787110542903178	0.04865248765803	4498	tags=61%, list=28%, signal=44%	PKLR/DLD/LDHAL6B/ALDH3A2/PC/HAGH/LDHA/ACAT1/ADH1A/LDHC/LDHD/ACOT12/ACACA/ALDH1B1/ADH4/ACAT2/FH/ALDH2/ALDH7A1/ADH6/ADH1B/PDHB/GRHPR/ALDH9A1/ADH1C/GLO1/ACACB/ACSS2
hsa05161	hsa05161	Hepatitis B	156	0.260732437314483	1.39962374577122	0.0285784	0.0787110542903178	0.04865248765803	3075	tags=28%, list=19%, signal=22%	BIRC5/CCNA2/PCNA/HRAS/MAPK13/CCNE1/YWHAZ/VDAC3/DDB2/TGFB3/CCNE2/IRF3/SRC/CASP8/E2F3/CDKN1A/IKBKE/TP53/APAF1/PIK3R2/IRAK1/BAX/MMP9/E2F2/MAPK9/TGFB2/PTK2B/JAK3/TGFB1/MAP2K2/CREB5/YWHAQ/TYK2/STAT4/CASP10/YWHAB/TLR4/CXCL8/MYC/IKBKG/PRKCB/PIK3CD/IRAK4
hsa00140	hsa00140	Steroid hormone biosynthesis	46	-0.332921	-1.43412	0.0292783	0.0799345400133589	0.0494087426031166	4612	tags=50%, list=29%, signal=36%	UGT2B17/UGT2B15/HSD17B2/CYP17A1/UGT2B4/AKR1C4/CYP3A4/HSD17B6/CYP2E1/HSD17B3/SRD5A2/HSD11B1/SRD5A1/AKR1D1/CYP1A2/CYP7B1/CYP1A1/HSD17B11/HSD17B12/CYP11B2/HSD11B2/HSD3B2/CYP7A1
hsa04151	hsa04151	PI3K-Akt signaling pathway	346	0.218086322860915	1.30967873581109	0.0297561	0.0805992196856517	0.0498195911153661	2967	tags=26%, list=19%, signal=22%	HRAS/PKN3/CCNE1/IL2RA/CCND1/YWHAZ/PPP2R1A/EREG/FGF19/CCNE2/CDC37/BCL2L1/ITGB3/CDK4/PPP2R2A/IL2RB/LAMB3/ITGA6/GNB1/ITGA2/RPS6/COL4A1/CDKN1A/MDM2/IL2RG/MYB/ITGA3/EIF4B/FGF1/TP53/PIK3R2/GNG8/ITGA4/TGFA/ITGAV/CCND3/F2R/LAMA1/LAMA3/LPAR2/THBS1/PIK3CG/COL4A2/AREG/G6PC3/GNG5/HSP90AB1/CSF3R/ITGB7/JAK3/CDK6/MAP2K2/PIK3R6/CREB5/YWHAQ/ITGB5/COL6A2/LAMA5/RELN/COMP/THBS2/ITGA5/TNC/EIF4EBP1/YWHAB/PRKAA2/PKN1/C…
hsa04211	hsa04211	Longevity regulating pathway	88	-0.27188	-1.37926	0.0317828	0.0854161492441268	0.0527970077947173	2801	tags=30%, list=17%, signal=25%	INSR/IRS2/IRS1/PRKAG2/AKT1/RHEB/ULK1/RB1CC1/PRKAB2/APPL1/ATF2/KL/KRAS/PRKAA1/ADIPOQ/STK11/ATG5/CREB3L4/SOD2/RPS6KB1/ADCY9/ADCY1/PIK3R1/FOXO1/SIRT1/IGF1
hsa04625	hsa04625	C-type lectin receptor signaling pathway	99	0.280852174046545	1.40107163745124	0.0327514	0.0873369541424302	0.0539842862202292	4012	tags=40%, list=25%, signal=30%	HRAS/MAPK13/RELB/SRC/CASP8/LSP1/ITPR3/IKBKE/MDM2/PIK3R2/CLEC4E/MAPK9/NFKB2/KSR1/CALML4/PPP3CC/CBLB/PPP3CB/PAK1/CALML5/CASP1/CYLD/FCER1G/CLEC7A/IKBKG/PLK3/CALML3/PIK3CD/PRKCD/NLRP3/PYCARD/PTGS2/CD209/SYK/MRAS/PIK3R3/MAPKAPK2/PLCG2/IL17D/MAPK3
hsa04976	hsa04976	Bile secretion	76	-0.282076	-1.39621	0.0335954	0.0888985710691423	0.054949545152897	5533	tags=54%, list=35%, signal=35%	SLC10A2/ADCY6/ATP1B4/BAAT/SCARB1/SLC4A5/PRKACA/SLC22A8/ABCB11/UGT2B17/PRKACG/UGT2B15/SLC9A3/UGT2B4/SLCO1B1/SLC4A4/SULT2A1/SLC22A7/ABCG8/ABCG5/CYP3A4/SLCO1A2/ATP1B2/SLC5A1/ATP1A4/SLC27A5/SLCO1B3/SLC22A1/LDLR/AQP9/SLC10A1/AQP4/ATP1A2/CA2/KCNN2/CYP7A1/HMGCR/ADCY9/ADCY1/RXRA/NR1H4
hsa05223	hsa05223	Non-small cell lung cancer	72	0.313210287561547	1.46860830182633	0.0417477	0.108797042857805	0.0672490901385453	4082	tags=43%, list=25%, signal=32%	HRAS/CDKN2A/CCND1/DDB2/CDK4/RASSF1/E2F3/CDKN1A/TP53/PIK3R2/BAX/TGFA/E2F2/BAK1/JAK3/CDK6/MAP2K2/STK4/ERBB2/PRKCB/PIK3CD/PLCG1/GRB2/RASSF5/STAT5A/E2F1/RB1/PIK3R3/PLCG2/MAPK3/KIF5B
hsa00512	hsa00512	Mucin type O-glycan biosynthesis	32	0.381352679340692	1.45777875621207	0.0416137	0.108797042857805	0.0672490901385453	5335	tags=44%, list=33%, signal=29%	GCNT3/ST6GALNAC4/GALNT10/B3GNT3/C1GALT1/GALNT15/GALNT16/GALNT6/GALNT18/GALNT14/GALNT12/GALNT3/ST6GALNAC2/GALNT7
hsa05131	hsa05131	Shigellosis	213	0.231794412420032	1.30636161071907	0.042578	0.110126545654077	0.0680708758326914	4536	tags=39%, list=28%, signal=29%	HKDC1/SQSTM1/MAPK13/CCL5/PFN1/ACTB/IRF3/BCL2L1/MYL12B/SRC/CAPNS1/RIPK2/ITPR3/UBE2N/MYL12A/MDM2/RBX1/TP53/IL18/PIK3R2/CYTH2/CAPN2/CTTN/BAX/GLMN/MAPK9/ARPC1B/ARPC5/ILK/ACTN1/TLN1/NAIP/ARPC4/RPS27A/ITGA5/CASP1/WASF2/MYL9/CD44/UBA52/ATM/FNBP1/TLR4/ARPC3/NLRC4/CXCL8/CYTH4/CYTH1/IKBKG/PIK3CD/TRAF5/ARHGEF2/HK2/HK3/PLCG1/PRKCD/PRKCQ/HCLS1/RPS6KB2/NLRP3/ELMO2/PYCARD/MYL5/PLCB2/ARPC2/ACTR3/AKT1S1/HK1/MAP1L…
hsa04530	hsa04530	Tight junction	156	0.248462106197001	1.33375604255258	0.0429752	0.110324411002837	0.0681931793836386	3812	tags=34%, list=24%, signal=26%	PCNA/NEDD4L/TUBA1C/TUBA1B/CLDN4/CCND1/CLDN7/PPP2R1A/CLDN2/ACTB/MYH9/MYL12B/MSN/CDK4/PPP2R2A/SRC/NF2/MYL12A/CTTN/HSPA4/MAPK9/ARPC1B/WAS/ARPC5/ACTN1/MARVELD3/RAB8B/MYL6/ARPC4/SYMPK/PRKAB1/MYL9/PRKAA2/VASP/CLDN3/ARPC3/MICALL2/PPP2CA/CLDN15/ERBB2/SCRIB/ARHGEF2/DLG3/ARHGEF18/MYL6B/HCLS1/TUBA1A/EZR/TUBA4A/ARPC2/ACTR3/PRKAG1/CFTR
hsa00230	hsa00230	Purine metabolism	114	0.273543114613335	1.39480693428316	0.0433592	0.110485669797292	0.0682928558722551	4215	tags=37%, list=26%, signal=27%	RRM1/RRM2/ADSL/NME1/IMPDH2/NUDT2/ATIC/APRT/NT5M/ENTPD6/ADA/AK1/ITPA/CANT1/NPR2/ADCY2/AK2/NT5C2/GUK1/NT5C/HDDC3/HDDC2/PDE6D/PDE4D/ADCY7/NTPCR/IMPDH1/DGUOK/PDE7A/PDE4A/PDE1C/AMPD2/PDE4B/PDE5A/PAPSS1/DCK/AMPD3/GUCY1A2/PDE7B/ENTPD1/ADCY4/PDE6G
hsa04662	hsa04662	B cell receptor signaling pathway	81	0.299228596479972	1.44190793076858	0.0443262	0.112119315811431	0.0693026370682652	4453	tags=49%, list=28%, signal=36%	HRAS/LILRB1/PIK3R2/LILRB4/CD72/LYN/MAP2K2/PPP3CC/CARD11/LILRB2/VAV1/PPP3CB/RAC2/BTK/NFKBIE/PTPN6/CD19/LILRB5/IKBKG/INPP5D/PRKCB/DAPP1/PIK3CD/BLK/GRB2/LILRA1/LILRA6/LILRA2/FCGR2B/LILRB3/CD79B/SYK/PIK3R3/INPPL1/PLCG2/MAPK3/NFKBIB/LILRA5/BANK1/NRAS
hsa00030	hsa00030	Pentose phosphate pathway	30	0.397335829646697	1.49561007577077	0.0460177	0.115548091208578	0.0714220147617283	1531	tags=27%, list=10%, signal=24%	TKT/PFKP/ALDOA/TALDO1/PGD/G6PD/GPI/PGLS
hsa01524	hsa01524	Platinum drug resistance	67	0.308641079192738	1.42421564728177	0.0463659	0.115578669968049	0.071440915953323	4278	tags=43%, list=27%, signal=32%	BIRC5/TOP2A/CDKN2A/BCL2L1/CASP8/POLH/CDKN1A/MDM2/TP53/APAF1/PIK3R2/BAX/BAK1/MGST3/GSTA3/GSTO2/ATM/ERBB2/PMAIP1/PIK3CD/GSTO1/GSTP1/PIK3R3/FADD/BCL2/MAPK3/FASLG/MSH2/GSTA4
hsa05230	hsa05230	Central carbon metabolism in cancer	67	0.306103783525422	1.41250736722837	0.0474453	0.11741847397994	0.0725781265114685	4094	tags=43%, list=26%, signal=32%	HKDC1/PFKP/HRAS/PDHA1/SCO2/G6PD/LDHB/PKM/TP53/PIK3R2/SLC2A1/SLC7A5/MAP2K2/SLC1A5/PGAM1/MYC/ERBB2/HIF1A/PIK3CD/HK2/HK3/GLS/PDHA2/PFKM/HK1/PIK3R3/MAPK3/SIRT6/PDGFRB
hsa05210	hsa05210	Colorectal cancer	85	0.29094052469369	1.41886793573593	0.0479452	0.117808219178082	0.0728190338860851	4488	tags=41%, list=28%, signal=30%	BIRC5/HRAS/CCND1/DDB2/EREG/TGFB3/RALA/CDKN1A/TP53/PIK3R2/LEF1/BAX/TGFA/MAPK9/TGFB2/BAK1/AREG/TCF7/AXIN2/TGFB1/MAP2K2/RAC2/MYC/PMAIP1/PIK3CD/AXIN1/GRB2/RPS6KB2/PIK3R3/BCL2/MAPK3/MSH2/NRAS/RHOA/BCL2L11
hsa03420	hsa03420	Nucleotide excision repair	57	0.320849517079087	1.42910601873175	0.0499076	0.120902866366405	0.0747318819033473	2234	tags=26%, list=14%, signal=23%	LIG1/PCNA/RFC4/POLR2G/POLD1/RFC3/POLR2L/DDB2/POLR2E/POLE4/RFC2/RBX1/RPA1/CETN2/RAD23A
hsa04936	hsa04936	Alcoholic liver disease	135	-0.236843	-1.32434	0.0498728	0.120902866366405	0.0747318819033473	4667	tags=41%, list=29%, signal=30%	IFNA2/IFNA16/TICAM1/PRKAG3/FOXO3/MLYCD/SCD/ALDH3A2/NFKB1/CTNNB1/C5/IFNA5/ADH1A/LPIN2/ADIPOR2/AKT2/ACACA/ALDH1B1/ADH4/PPARA/CYP2E1/LPIN3/C3/LBP/CXCL2/ACOX1/ALDH2/ALDH7A1/ADH6/PRKAG2/ADH1B/AKT1/TCF7L2/GSK3B/PRKAB2/ALDH9A1/MAP3K5/ADH1C/MAPK8/RIPK1/TAB3/TBK1/CHUK/PRKAA1/ADIPOQ/SREBF1/C2/IL17A/ACACB/MAPK14/TIRAP/TNF/FOXO1/TAB2/SIRT1/LPIN1
